# Supplementary material for: Learning-induced gene expression in the heads of two Nasonia species that differ in long-term memory formation
Source: PubMed Central journal article supplement (PMC4440501; doi:10.1186/s12864-015-1355-1), 2015-03-10
Supplement: 12864_2015_1355_MOESM1_ESM.pdf [file 12864_2015_1355_MOESM1_ESM.pdf]

# Learning-induced gene expression in the heads of two *Nasonia* species that differ in long-term memory formation

Katja M. Hoedjes, Hans M. Smid, Elio G. W. M. Schijlen, Louise E. M. Vet, Joke J. F. A. van Vugt

--Figure S1--

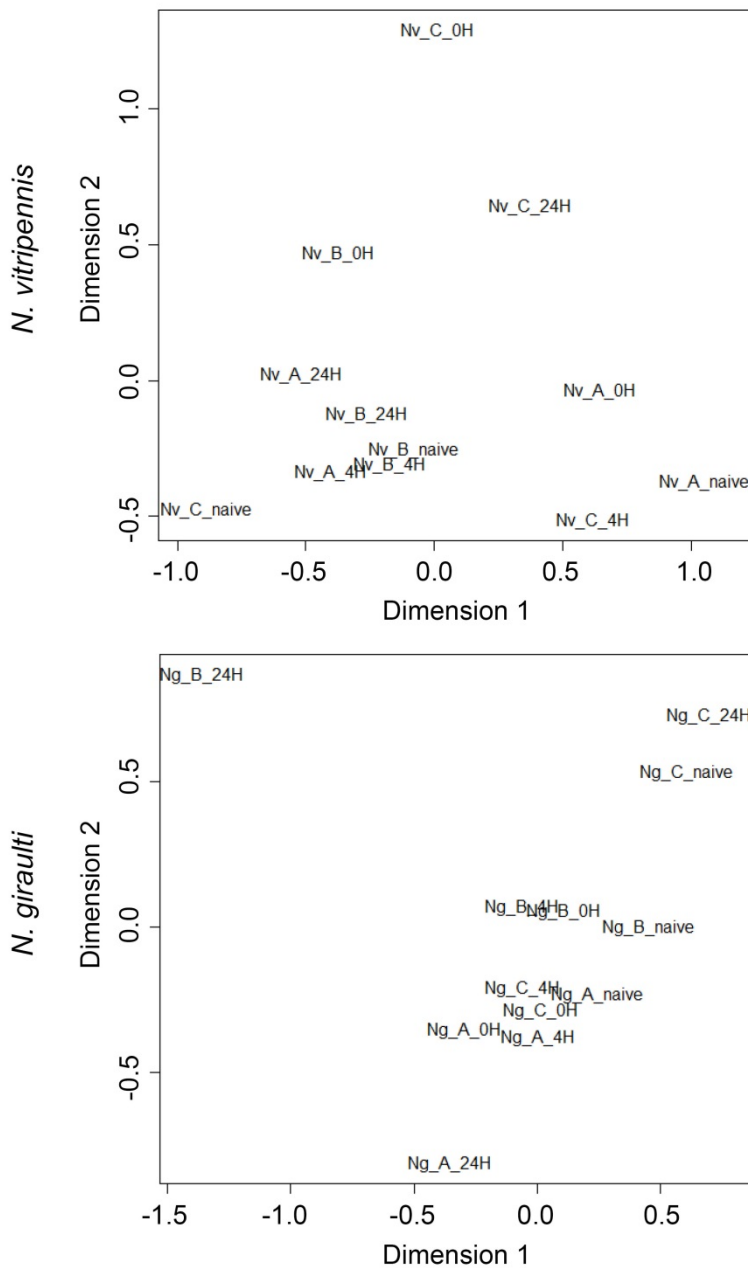

**Multi-dimension scaling plots of the biological coefficients of variation.** Variation between experimental treatments (0h, 4h, 24h and naïve) and replicates (A, B, C) was analyzed for *N. vitripennis* (top) and *N. giraulti* separately (bottom). The scaling plots reveal that the gene expression data was not affected by a replicate effect. Also, no clear clustering based on experimental treatment is visible.

--Figure S2--

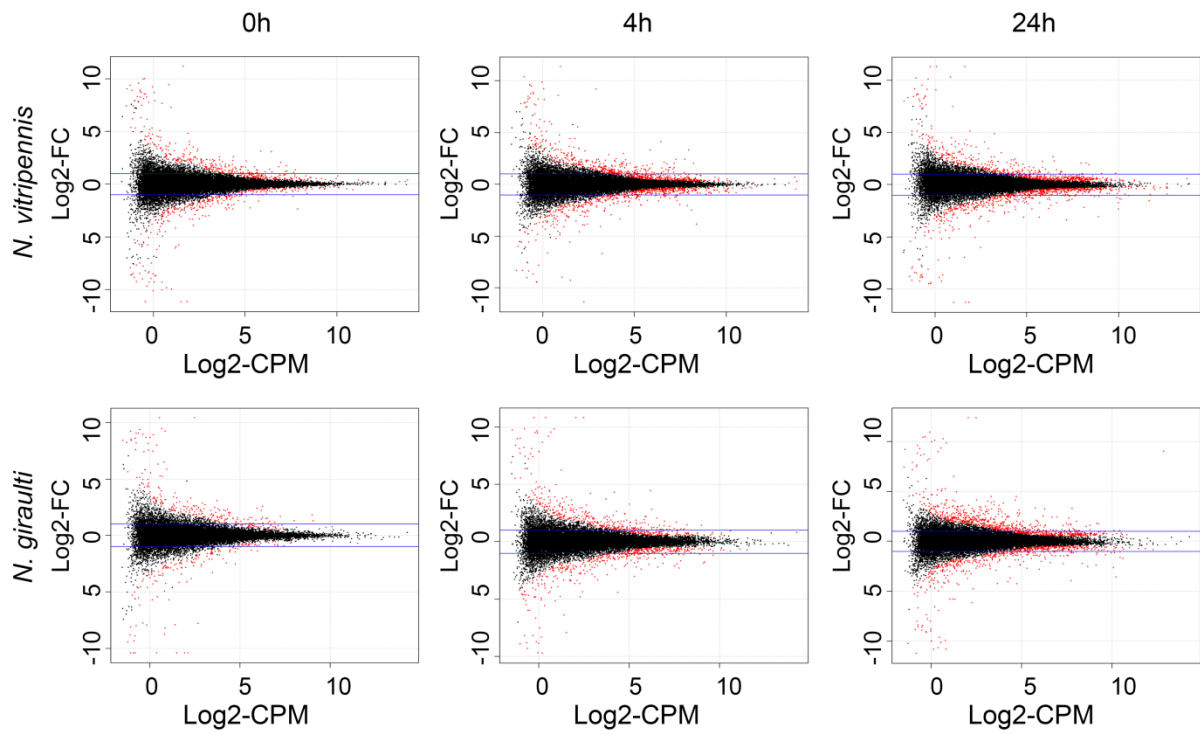

**Distribution of DE transcripts.** The log<sub>2</sub>-fold change (FC) and log<sub>2</sub>-count-per-million (CPM) are plotted for each transcript at the indicated time points. Transcripts that are significantly DE compared to naïve expression are shown in red, whereas transcripts that are not are shown in black.

--Table S1--

**Transcriptome analysis statistics.** The numbers of reads before and after quality filtering and adapter trimming are shown, together with statistics of the *de novo* transcriptome assemblies for both *N. vitripennis* and *N. giraulti*. These statistics include the number of genes and transcripts both before and after filtering (> 1 cpm for at least 3 samples). The definition of genes and transcripts has been described in the materials and methods section. The number of genes with either one or multiple splice variants (transcripts) is also given. The transcriptome size in bp (i.e. the combined length of the genes), the N50 (the number of transcripts with the largest sizes which together make up for half the transcriptome) and maximum transcript length were determined from the filtered transcripts.

|                                 | <i>N. vitripennis</i> | <i>N. giraulti</i> |
|---------------------------------|-----------------------|--------------------|
| Raw reads                       | 294,289,458           | 294,210,825        |
| Filtered reads                  | 218,100,037           | 220,260,984        |
| Unfiltered genes                | 92,097                | 82,351             |
| Unfiltered transcripts          | 139,448               | 129,060            |
| Filtered genes                  | 15,789                | 15,453             |
| <i>Single splice variant</i>    | 11,574                | 11,274             |
| <i>Multiple splice variants</i> | 4,215                 | 4,179              |
| Filtered transcripts            | 30,223                | 29,641             |
| Transcriptome size (bp)         | 33,232,483            | 32,353,139         |
| N50                             | 4,949                 | 5,019              |
| Maximum transcript length       | 48,825                | 49,445             |

--Table S2--

**Comparison of naïve gene expression levels in the heads of *N. vitripennis* and *N. giraulti*.**

Differences in naïve gene expression levels between the two species were determined by comparing differential gene expression of naïve *N. giraulti* to naïve *N. vitripennis* expression. As two separate transcriptomes had been made for the two species, not all transcripts could be compared to each other, but only the transcripts that were present in both species, as determined by a best-hit blast to the Nvit2.0 proteome. Transcripts of the same transcriptome that had a hit to the same Nvit2.0 protein (for example as a result of splice variation) were removed, as it is uncertain which of these transcripts could be compared with transcript(s) with a best blast hit to the same Nvit2.0 protein of the other species. Differential expression analysis, using EdgeR with GLM trended dispersion with Pearson correlation (as described in the Methods section), was done using naïve *N. vitripennis* as a reference. Consequently, a total of 4275 transcripts, of the 9412 overlapping transcripts, could be compared amongst both species. Of these transcripts 957 were upregulated in *N. giraulti* compared to *N. vitripennis*, 993 were downregulated. The table is shown in Additional\_file\_2.

--Table S3--

**Enriched GO terms in genes that differ in expression levels between naïve *N. vitripennis* and *N. giraulti*.** GO enrichment analyses were done using Blast2go (Fisher's exact test,  $P < 0.05$ ) for genes that had a higher or lower expression level in naïve *N. giraulti* as compared to naïve *N. vitripennis* using the set of genes that could be compared between the two species as a reference. Generic GOSlim categories and the Blast2go option 'reduce to most specific terms' were used to limit the number of GO term categories. The enriched GO terms (GO ID and Term), the category of the GO term (C = cellular component, F = molecular function, P = biological process), their P-value and the number of genes in the test-set and the reference-set are given.

**Upregulated terms in naïve *N. giraulti* compared to naïve *N. vitripennis***

| GO ID      | Category | Term                         | P-Value  | #Test | #Ref |
|------------|----------|------------------------------|----------|-------|------|
| GO:0005840 | C        | ribosome                     | 2.34E-09 | 45    | 9    |
| GO:0005198 | F        | structural molecule activity | 6.72E-08 | 48    | 14   |
| GO:0006412 | P        | translation                  | 1.60E-02 | 45    | 34   |

**Downregulated terms in naïve *N. giraulti* compared to naïve *N. vitripennis***

| GO ID      | Category | Term                                              | P-Value  | #Test | #Ref |
|------------|----------|---------------------------------------------------|----------|-------|------|
| GO:0007267 | P        | cell-cell signaling                               | 7.07E-03 | 22    | 11   |
| GO:0040007 | P        | growth                                            | 1.95E-02 | 15    | 7    |
| GO:0008135 | F        | translation factor activity, nucleic acid binding | 2.52E-02 | 12    | 5    |
| GO:0006139 | P        | nucleobase-containing compound metabolic process  | 3.13E-02 | 90    | 87   |
| GO:0044767 | P        | single-organism developmental process             | 4.97E-02 | 85    | 84   |

--Table S4--

**Enriched GO terms in differentially expressed protein-coding transcripts.** GO enrichment analyses were done using Blast2go (Fisher's exact test,  $P < 0.05$ ) for differentially expressed genes that are unique for *N. vitripennis*, unique for *N. giraulti*, and for genes that are differentially expressed at different time-points after conditioning of both species. Generic GOSlim categories and the Blast2go option 'reduce to most specific terms' were used to limit the number of GO term categories. The enriched GO terms (GO ID and Term), the category of the GO term (C = cellular component, F = molecular function, P = biological process), their P-value and the number of genes in the test-set and the reference-set are given.

**Differentially expressed transcripts unique for *N. vitripennis***

| GO ID      | Category | Term                            | P-Value  | #Test | #Ref |
|------------|----------|---------------------------------|----------|-------|------|
| GO:0003824 | F        | catalytic activity              | 3,62E-04 | 280   | 2071 |
| GO:0005509 | F        | calcium ion binding             | 2,29E-03 | 21    | 85   |
| GO:0009719 | P        | response to endogenous stimulus | 4,07E-03 | 11    | 33   |
| GO:0008289 | F        | lipid binding                   | 2,25E-02 | 12    | 50   |
| GO:0005102 | F        | receptor binding                | 2,25E-02 | 12    | 50   |
| GO:0000003 | P        | reproduction                    | 3,57E-02 | 43    | 275  |
| GO:0006629 | P        | lipid metabolic process         | 3,70E-02 | 19    | 101  |
| GO:0019748 | P        | secondary metabolic process     | 4,79E-02 | 5     | 15   |

**Differentially expressed transcripts unique for *N. giraulti***

| GO ID      | Category | Term                                              | P-Value  | #Test | #Ref |
|------------|----------|---------------------------------------------------|----------|-------|------|
| GO:0000166 | F        | nucleotide binding                                | 1,55E-05 | 109   | 731  |
| GO:0006259 | P        | DNA metabolic process                             | 2,59E-04 | 25    | 108  |
| GO:0007049 | P        | cell cycle                                        | 3,81E-04 | 45    | 257  |
| GO:0009058 | P        | biosynthetic process                              | 5,20E-03 | 70    | 512  |
| GO:0007010 | P        | cytoskeleton organization                         | 1,04E-02 | 33    | 211  |
| GO:0008135 | F        | translation factor activity, nucleic acid binding | 1,07E-02 | 13    | 59   |
| GO:0019538 | P        | protein metabolic process                         | 1,89E-02 | 96    | 785  |
| GO:0030234 | F        | enzyme regulator activity                         | 3,17E-02 | 20    | 124  |
| GO:0003774 | F        | motor activity                                    | 3,32E-02 | 7     | 28   |
| GO:0030246 | F        | carbohydrate binding                              | 3,48E-02 | 6     | 22   |
| GO:0016301 | F        | kinase activity                                   | 4,91E-02 | 45    | 348  |

***N. vitripennis* 0H after conditioning - Upregulated**

| GO ID      | Category | Term                 | P-Value  | #Test | #Ref |
|------------|----------|----------------------|----------|-------|------|
| GO:0005509 | F        | calcium ion binding  | 1,32E-03 | 10    | 96   |
| GO:0007165 | P        | signal transduction  | 5,32E-03 | 30    | 584  |
| GO:0005215 | F        | transporter activity | 2,57E-02 | 18    | 344  |

|            |   |                                 |          |   |    |
|------------|---|---------------------------------|----------|---|----|
| GO:0005811 | C | lipid particle                  | 2,74E-02 | 6 | 70 |
| GO:0009719 | P | response to endogenous stimulus | 4,37E-02 | 4 | 40 |

***N. vitripennis* 0H after conditioning - Downregulated**

| GO ID      | Category | Term                       | P-Value  | #Test | #Ref |
|------------|----------|----------------------------|----------|-------|------|
| GO:0050896 | P        | response to stimulus       | 1,84E-02 | 33    | 936  |
| GO:0016032 | P        | viral process              | 3,74E-02 | 2     | 11   |
| GO:0004871 | F        | signal transducer activity | 4,81E-02 | 5     | 78   |

***N. vitripennis* 4H after conditioning - Upregulated**

| GO ID      | Category | Term                            | P-Value  | #Test | #Ref |
|------------|----------|---------------------------------|----------|-------|------|
| GO:0005840 | C        | ribosome                        | 1,27E-14 | 32    | 78   |
| GO:0006412 | P        | translation                     | 2,08E-11 | 42    | 186  |
| GO:0005198 | F        | structural molecule activity    | 1,90E-09 | 33    | 142  |
| GO:0003723 | F        | RNA binding                     | 1,89E-04 | 28    | 200  |
| GO:0005730 | C        | nucleolus                       | 2,49E-03 | 13    | 77   |
| GO:0000003 | P        | reproduction                    | 4,36E-03 | 31    | 287  |
| GO:0008283 | P        | cell proliferation              | 1,37E-02 | 13    | 97   |
| GO:0009719 | P        | response to endogenous stimulus | 1,46E-02 | 7     | 37   |
| GO:0005215 | F        | transporter activity            | 4,10E-02 | 30    | 332  |

***N. vitripennis* 4H after conditioning - Downregulated**

| GO ID      | Category | Term                           | P-Value  | #Test | #Ref |
|------------|----------|--------------------------------|----------|-------|------|
| GO:0005811 | C        | lipid particle                 | 7,62E-04 | 10    | 66   |
| GO:0016787 | F        | hydrolase activity             | 1,30E-03 | 54    | 866  |
| GO:0005975 | P        | carbohydrate metabolic process | 2,24E-03 | 13    | 120  |
| GO:0005764 | C        | lysosome                       | 1,98E-02 | 3     | 12   |
| GO:0019748 | P        | secondary metabolic process    | 4,29E-02 | 3     | 17   |
| GO:0006629 | P        | lipid metabolic process        | 4,84E-02 | 9     | 111  |

***N. vitripennis* 24H after conditioning - Upregulated**

| GO ID      | Category | Term                         | P-Value  | #Test | #Ref |
|------------|----------|------------------------------|----------|-------|------|
| GO:0005840 | C        | ribosome                     | 1,51E-50 | 63    | 47   |
| GO:0005198 | F        | structural molecule activity | 6,01E-35 | 63    | 112  |
| GO:0006412 | P        | translation                  | 3,64E-29 | 65    | 163  |
| GO:0005811 | C        | lipid particle               | 2,37E-07 | 18    | 58   |
| GO:0005829 | C        | cytosol                      | 5,32E-03 | 17    | 130  |
| GO:0003723 | F        | RNA binding                  | 7,22E-03 | 23    | 205  |

***N. vitripennis* 24H after conditioning - Downregulated**

| GO ID      | Category | Term                           | P-Value  | #Test | #Ref |
|------------|----------|--------------------------------|----------|-------|------|
| GO:0005509 | F        | calcium ion binding            | 6,26E-06 | 18    | 88   |
| GO:0003824 | F        | catalytic activity             | 2,03E-05 | 155   | 2196 |
| GO:0019748 | P        | secondary metabolic process    | 3,98E-05 | 7     | 13   |
| GO:0005975 | P        | carbohydrate metabolic process | 4,41E-04 | 17    | 116  |
| GO:0005811 | C        | lipid particle                 | 1,65E-03 | 11    | 65   |

|            |   |                                                |          |    |     |
|------------|---|------------------------------------------------|----------|----|-----|
| GO:0016209 | F | antioxidant activity                           | 2,49E-03 | 4  | 8   |
| GO:0006629 | P | lipid metabolic process                        | 3,35E-03 | 14 | 106 |
| GO:0008289 | F | lipid binding                                  | 4,21E-03 | 9  | 53  |
| GO:0009719 | P | response to endogenous stimulus                | 6,77E-03 | 7  | 37  |
| GO:0019825 | F | oxygen binding                                 | 7,73E-03 | 2  | 1   |
| GO:0009056 | P | catabolic process                              | 1,06E-02 | 30 | 346 |
| GO:0008092 | F | cytoskeletal protein binding                   | 1,81E-02 | 14 | 132 |
| GO:0006091 | P | generation of precursor metabolites and energy | 2,57E-02 | 10 | 86  |

#### ***N. giraulti* 0H after conditioning - Upregulated**

| GO ID      | Category | Term                                                        | P-Value  | #Test | #Ref |
|------------|----------|-------------------------------------------------------------|----------|-------|------|
| GO:0003700 | F        | sequence-specific DNA binding transcription factor activity | 4,50E-04 | 11    | 166  |
| GO:0003677 | F        | DNA binding                                                 | 5,12E-04 | 16    | 322  |
| GO:0000166 | F        | nucleotide binding                                          | 5,80E-03 | 26    | 814  |
| GO:0050789 | P        | regulation of biological process                            | 6,89E-03 | 38    | 1362 |
| GO:0008219 | P        | cell death                                                  | 2,16E-02 | 8     | 175  |
| GO:0009653 | P        | anatomical structure morphogenesis                          | 3,73E-02 | 18    | 597  |
| GO:0005215 | F        | transporter activity                                        | 4,77E-02 | 12    | 362  |

#### ***N. giraulti* 0H after conditioning - Downregulated**

| GO ID      | Category | Term                    | P-Value  | #Test | #Ref |
|------------|----------|-------------------------|----------|-------|------|
| GO:0003779 | F        | actin binding           | 2,34E-02 | 4     | 84   |
| GO:0044699 | P        | single-organism process | 4,89E-02 | 31    | 1897 |

#### ***N. giraulti* 4H after conditioning - Upregulated**

| GO ID      | Category | Term                                              | P-Value  | #Test | #Ref |
|------------|----------|---------------------------------------------------|----------|-------|------|
| GO:0005730 | C        | nucleolus                                         | 1,29E-06 | 16    | 80   |
| GO:0008135 | F        | translation factor activity, nucleic acid binding | 1,40E-04 | 11    | 61   |
| GO:0000166 | F        | nucleotide binding                                | 1,57E-04 | 55    | 785  |
| GO:0006412 | P        | translation                                       | 3,24E-04 | 21    | 205  |
| GO:0006139 | P        | nucleobase-containing compound metabolic process  | 5,31E-03 | 37    | 556  |

#### ***N. giraulti* 4H after conditioning - Downregulated**

| GO ID      | Category | Term                                           | P-Value  | #Test | #Ref |
|------------|----------|------------------------------------------------|----------|-------|------|
| GO:0005975 | P        | carbohydrate metabolic process                 | 7,16E-06 | 16    | 117  |
| GO:0006629 | P        | lipid metabolic process                        | 1,58E-02 | 9     | 108  |
| GO:0006091 | P        | generation of precursor metabolites and energy | 2,11E-02 | 8     | 95   |
| GO:0019748 | P        | secondary metabolic process                    | 3,13E-02 | 3     | 18   |
| GO:0005811 | C        | lipid particle                                 | 4,28E-02 | 6     | 71   |
| GO:0016787 | F        | hydrolase activity                             | 4,74E-02 | 40    | 889  |



***N. giraulti* 24H after conditioning - Upregulated**

| GO ID      |   | Term                                              | P-Value  | #Test | #Ref |
|------------|---|---------------------------------------------------|----------|-------|------|
| GO:0005840 | C | ribosome                                          | 4,44E-47 | 65    | 45   |
| GO:0006412 | P | translation                                       | 1,74E-42 | 86    | 140  |
| GO:0005198 | F | structural molecule activity                      | 6,01E-33 | 68    | 113  |
| GO:0007049 | P | cell cycle                                        | 7,24E-07 | 46    | 256  |
| GO:0008135 | F | translation factor activity, nucleic acid binding | 1,01E-05 | 17    | 55   |
| GO:0005829 | C | cytosol                                           | 1,36E-05 | 26    | 120  |
| GO:0005811 | C | lipid particle                                    | 9,83E-05 | 16    | 61   |
| GO:0000166 | F | nucleotide binding                                | 4,63E-03 | 80    | 760  |
| GO:0005694 | C | chromosome                                        | 8,43E-03 | 17    | 108  |
| GO:0007010 | P | cytoskeleton organization                         | 9,75E-03 | 28    | 216  |
| GO:0006259 | P | DNA metabolic process                             | 1,52E-02 | 17    | 116  |
| GO:0009055 | F | electron carrier activity                         | 2,65E-02 | 5     | 19   |
| GO:0005730 | C | nucleolus                                         | 4,40E-02 | 12    | 84   |

***N. giraulti* 24H after conditioning - Downregulated**

| GO ID      | Category | Term                                | P-Value  | #Test | #Ref |
|------------|----------|-------------------------------------|----------|-------|------|
| GO:0005509 | F        | calcium ion binding                 | 2,07E-04 | 13    | 86   |
| GO:0005975 | P        | carbohydrate metabolic process      | 3,78E-04 | 15    | 118  |
| GO:0003774 | F        | motor activity                      | 2,89E-03 | 6     | 29   |
| GO:0006629 | P        | lipid metabolic process             | 9,15E-03 | 11    | 106  |
| GO:0005811 | C        | lipid particle                      | 1,42E-02 | 8     | 69   |
| GO:0005215 | F        | transporter activity                | 2,16E-02 | 24    | 350  |
| GO:0052689 | F        | carboxylic ester hydrolase activity | 3,16E-02 | 2     | 5    |
| GO:0019725 | P        | cellular homeostasis                | 3,26E-02 | 6     | 52   |
| GO:0008037 | P        | cell recognition                    | 3,49E-02 | 5     | 39   |

--Table S5--

**DE transcripts involved in signalling in *N. vitripennis*.** Presented here are the differentially expressed transcripts in *N. vitripennis* immediately after conditioning, which were clustered in the enriched GO terms ‘signal transduction’ (GO:0007165), ‘response to endogenous stimulus’ (GO:0009719) and ‘response to stimulus’ (GO:0050896). The log<sub>2</sub>-fold change (FC), log<sub>2</sub>-count per million (cpm) and the level of significance of the transcripts are given. In addition, the DE pattern of each transcript is shown for *N. vitripennis* (NV) and *N. giraulti* (NG); ↓ = downregulated, ↑ = upregulated, n.a. = transcript not available in the transcriptome. The transcripts were ordered based on their absolute fold change.

| OGS2.0 ID        | Transcript ID      | Gene description                                       | log <sub>2</sub> -FC | log <sub>2</sub> -cpm | P-value  | DE pattern NV | DE pattern NG |
|------------------|--------------------|--------------------------------------------------------|----------------------|-----------------------|----------|---------------|---------------|
| Nasvi2EG013237t1 | comp39228_c0_seq3  | Still life                                             | -10,14               | 0,02                  | 3,37E-08 | ↓0h,24h       | not DE        |
| Nasvi2EG008626t2 | comp483118_c0_seq1 | Unknown                                                | 8,20                 | -0,35                 | 9,96E-05 | ↑0h,4h,24h    | not DE        |
| Nasvi2EG013237t2 | comp29402_c0_seq1  | Still life                                             | 7,71                 | -0,77                 | 2,30E-04 | ↑0h,4h,24h    | not DE        |
| Nasvi2EG001811t1 | comp38721_c1_seq2  | Unknown                                                | -5,90                | 0,36                  | 4,58E-07 | ↓0h           | n.a           |
| Nasvi2EG023096t1 | comp34611_c0_seq2  | Lysine-specific histone demethylase 1A                 | 5,43                 | -0,47                 | 6,12E-05 | ↑0h           | not DE        |
| Nasvi2EG017531t1 | comp38970_c2_seq11 | TGF-beta receptor type-1                               | -4,50                | 0,69                  | 1,19E-05 | ↓0h           | not DE        |
| Nasvi2EG037341t1 | comp37043_c0_seq6  | Ras-related protein Rab-32                             | 4,30                 | -0,16                 | 4,54E-04 | ↑0h           | ↓4h,24h       |
| Nasvi2EG019393t1 | comp39881_c3_seq1  | Glutamate receptor subunit 1                           | 4,20                 | -0,44                 | 5,82E-04 | ↑0h           | not DE        |
| Nasvi2EG014089t3 | comp37425_c0_seq2  | TBC1 domain family member CG11727                      | 4,01                 | 1,99                  | 1,27E-08 | ↑0h,4h,24h    | n.a           |
| Nasvi2EG003595t2 | comp27330_c0_seq1  | SLIT-ROBO Rho GTPase-activating protein 1              | 3,92                 | 0,92                  | 1,07E-06 | ↑0h,4h,24h    | not DE        |
| Nasvi2EG009337t1 | comp36228_c0_seq7  | Tyrosine-protein kinase receptor                       | 3,82                 | 1,21                  | 3,21E-07 | ↑0h           | not DE        |
| Nasvi2EG004424t1 | comp39301_c4_seq16 | Dystrophin, isoforms A/C/F/G/H                         | -3,81                | -0,06                 | 5,77E-04 | ↓0h           | n.a           |
| Nasvi2EG023114t1 | comp39910_c1_seq23 | Phosphatidylinositol 3-kinase catalytic subunit type 3 | 3,80                 | -0,13                 | 3,27E-04 | ↑0h           | ↓0h           |
| Nasvi2EG003595t2 | comp27330_c0_seq4  | SLIT-ROBO Rho GTPase-activating protein 1              | 3,72                 | 1,99                  | 4,72E-08 | ↑0h,4h,24h    | not DE        |
| Nasvi2EG009337t1 | comp36228_c0_seq6  | Tyrosine-protein kinase receptor                       | 3,68                 | 0,31                  | 1,41E-04 | ↑0h           | not DE        |
| Nasvi2EG008869t3 | comp39661_c11_seq7 | Unknown                                                | -3,46                | 0,13                  | 3,28E-04 | ↓0h           | n.a           |

|                  |                     |                                                  |       |      |          |            |         |
|------------------|---------------------|--------------------------------------------------|-------|------|----------|------------|---------|
| Nasvi2EG007191t1 | comp13537_c0_seq1   | Death related ced-3/Nedd2 protein                | -3,39 | 0,46 | 8,47E-05 | ↓0h        | not DE  |
| Nasvi2EG006407t3 | comp35269_c1_seq1   | Tyrosine-protein kinase Src64B                   | -3,39 | 0,16 | 8,61E-04 | ↓0h        | not DE  |
| Nasvi2EG013660t1 | comp33709_c0_seq3   | Biotin--protein ligase                           | -2,89 | 0,50 | 4,04E-04 | ↓0h        | ↓4h     |
| Nasvi2EG014089t3 | comp37425_c0_seq17  | TBC1 domain family member CG11727                | 2,86  | 1,65 | 1,75E-05 | ↑0h        | n.a     |
| Nasvi2EG004379t4 | comp37393_c0_seq4   | E3 ubiquitin-protein ligase UBR2                 | -2,73 | 1,16 | 9,18E-05 | ↓0h        | not DE  |
| Nasvi2EG014516t1 | comp39309_c2_seq19  | Ras-related protein Rab-6A                       | -2,52 | 2,39 | 6,00E-06 | ↓0h        | not DE  |
| Nasvi2EG002305t1 | comp32573_c0_seq3   | GTP-binding protein Di-Ras2                      | 2,51  | 0,72 | 3,76E-04 | ↑0h        | not DE  |
| Nasvi2EG015011t1 | comp37930_c2_seq4   | Parathyroid hormone-related peptide receptor     | -2,42 | 1,23 | 1,47E-04 | ↓0h        | ↓24h    |
| Nasvi2EG014393t1 | comp43869_c0_seq1   | Unknown                                          | 2,35  | 1,96 | 5,24E-05 | ↑0h,4h     | not DE  |
| Nasvi2EG015580t1 | comp35764_c0_seq4   | Armadillo segment polarity protein               | -2,30 | 5,31 | 5,21E-28 | ↓0h,4h,24h | ↓24h    |
| Nasvi2EG005268t1 | comp34705_c0_seq5   | Crumbs protein                                   | 2,27  | 3,11 | 6,31E-08 | ↑0h,4h,24h | not DE  |
| Nasvi2EG011643t3 | comp26279_c0_seq1   | DNA repair endonuclease XPF                      | 2,26  | 1,30 | 4,00E-04 | ↑0h        | n.a     |
| Nasvi2EG005229t1 | comp27827_c0_seq2   | Signal transducing adapter molecule 1            | -2,25 | 2,75 | 8,24E-06 | ↓0h        | not DE  |
| Nasvi2EG019874t3 | comp38852_c1_seq15  | Triple functional domain protein                 | 2,25  | 1,87 | 1,17E-04 | ↑0h        | not DE  |
| Nasvi2EG015607t1 | comp36072_c0_seq2   | Deoxyribodipyrimidine photo-lyase                | -2,16 | 1,86 | 3,48E-04 | ↓0h        | not DE  |
| Nasvi2EG010744t1 | comp39149_c0_seq12  | Metabotropic glutamate receptor (mangetout)      | -2,14 | 1,04 | 1,12E-03 | ↓0h,4h,24h | not DE  |
| Nasvi2EG000868t1 | comp38978_c0_seq7   | Tachykinin peptides receptor 99D-like            | 2,01  | 1,21 | 9,61E-04 | ↑0h        | ↑4h,24h |
| Nasvi2EG022273t2 | comp36648_c0_seq8   | GTP-binding protein Rheb homolog                 | -1,97 | 4,08 | 8,19E-10 | ↓0h        | not DE  |
| Nasvi2EG014089t3 | comp37425_c0_seq5   | TBC1 domain family member CG11727                | -1,95 | 4,41 | 5,77E-10 | ↓0h,24h    | n.a     |
| Nasvi2EG015809t1 | comp33742_c0_seq1   | Innexin inx1                                     | 1,87  | 3,41 | 5,32E-07 | ↑0h,4h     | not DE  |
| Nasvi2EG009786t4 | comp38864_c1_seq5   | Guanine nucleotide-releasing factor 2            | -1,83 | 3,75 | 1,86E-07 | ↓0h        | not DE  |
| Nasvi2EG008107t4 | comp27284_c0_seq3   | OTU domain-containing protein 7B, putative       | 1,78  | 3,27 | 2,37E-06 | ↑0h,4h     | not DE  |
| Nasvi2EG002499t2 | comp39261_c0_seq105 | Retinal degeneration B protein                   | 1,72  | 2,72 | 1,17E-03 | ↑0h,4h,24h | ↓24h    |
| Nasvi2EG007375t3 | comp33212_c0_seq3   | E3 ubiquitin-protein ligase suppressor of deltex | -1,65 | 2,98 | 1,31E-04 | ↓0h        | not DE  |
| Nasvi2EG015580t1 | comp35764_c0_seq5   | Armadillo segment polarity protein               | 1,62  | 4,88 | 1,38E-12 | ↑0h,4h,24h | ↓24h    |
| Nasvi2EG009786t4 | comp38864_c1_seq7   | Guanine nucleotide-releasing factor 2            | -1,58 | 3,26 | 9,43E-05 | ↓0h        | not DE  |
| Nasvi2EG003715t2 | comp37447_c0_seq28  | Afadin                                           | -1,58 | 4,66 | 4,92E-09 | ↓0h        | not DE  |
| Nasvi2EG009786t4 | comp38864_c1_seq6   | Guanine nucleotide-releasing factor 2            | 1,48  | 2,92 | 6,04E-04 | ↑0h,4h,24h | not DE  |
| Nasvi2EG008626t2 | comp38080_c0_seq26  | Unknown                                          | 1,43  | 4,34 | 6,29E-07 | ↑0h ↓24h   | not DE  |
| Nasvi2EG001535t1 | comp34948_c0_seq2   | Serine/threonine-protein kinase SNF1 kinase 2    | 1,40  | 2,97 | 7,75E-04 | ↑0h,24h    | not DE  |

|                  |                    |                                                            |       |       |          |             |            |
|------------------|--------------------|------------------------------------------------------------|-------|-------|----------|-------------|------------|
| Nasvi2EG037341t1 | comp37043_c0_seq1  | Ras-related protein Rab-32                                 | -1,39 | 3,46  | 4,55E-05 | ↓0h,4h,24h  | ↓4h,24h    |
| Nasvi2EG009786t4 | comp38864_c1_seq3  | Guanine nucleotide-releasing factor 2                      | 1,20  | 3,45  | 5,82E-04 | ↑0h,4h,24h  | not DE     |
| Nasvi2EG003084t2 | comp26839_c0_seq1  | Reticulon-1                                                | -1,20 | 7,63  | 1,33E-24 | ↓0h,4h,24h  | ↓0h,24h    |
| Nasvi2EG037152t1 | comp31826_c2_seq2  | Ecdysone-induced protein 75B                               | 1,17  | 7,20  | 1,75E-21 | ↑0h,4h,24h  | ↑0h,4h,24h |
| Nasvi2EG006681t8 | comp39113_c5_seq5  | Arginine-glutamic acid dipeptide repeats protein           | -1,14 | 4,12  | 2,65E-04 | ↓0h         | n.a        |
| Nasvi2EG025129t1 | comp34836_c0_seq1  | B-cell lymphoma 3-encoded protein                          | -1,13 | 4,29  | 8,02E-05 | ↓0h         | ↑0h,4h     |
| Nasvi2EG007441t6 | comp38606_c0_seq20 | 1-phosphatidylinositol-4,5-bisphosphate phosphodiesterase  | -1,12 | 4,56  | 1,64E-05 | ↓0h         | ↑24h       |
| Nasvi2EG011878t2 | comp35527_c5_seq2  | Roadkill, protein                                          | 0,89  | 7,21  | 3,60E-13 | ↑0h,4h      | ↑0h        |
| Nasvi2EG005342t1 | comp42369_c0_seq1  | Raf protein serine/threonine-protein kinase dRAF-1         | 0,85  | 5,78  | 1,84E-08 | ↑0h         | ↑0h        |
| Nasvi2EG002993t3 | comp39642_c22_seq8 | Serine/threonine-protein phosphatase 2A regulatory subunit | 0,84  | 5,68  | 8,05E-08 | ↑0h         | not DE     |
| Nasvi2EG010931t1 | comp14073_c0_seq2  | Mob as tumor suppressor                                    | -0,81 | 5,62  | 1,07E-06 | ↓0h ↑4h,24h | ↓0h,4h     |
| Nasvi2EG007441t4 | comp38606_c0_seq1  | 1-phosphatidylinositol-4,5-bisphosphate phosphodiesterase  | -0,80 | 5,04  | 1,18E-04 | ↓0h         | not DE     |
| Nasvi2EG013237t2 | comp39228_c0_seq8  | Still life, protein                                        | -0,73 | 5,07  | 3,44E-04 | ↓0h         | not DE     |
| Nasvi2EG008393t1 | comp40145_c0_seq1  | Antimicrobial peptide Def1-1                               | -0,60 | 7,57  | 2,01E-07 | ↓0h         | ↑4h,24h    |
| Nasvi2EG013710t2 | comp37252_c0_seq1  | ADIPOR receptor CG5315-like, putative                      | 0,58  | 6,91  | 7,06E-06 | ↑0h,4h,24h  | not DE     |
| Nasvi2EG002888t3 | comp13915_c1_seq1  | Spinster protein, putative                                 | -0,57 | 5,46  | 6,96E-04 | ↓0h         | ↓4h        |
| Nasvi2EG014068t1 | comp41689_c0_seq1  | Transcription factor AP-1                                  | 0,57  | 5,86  | 1,39E-04 | ↑0h         | ↑24h       |
| Nasvi2EG008392t1 | comp40158_c0_seq1  | Antimicrobial peptide Def1-1                               | -0,56 | 5,97  | 1,45E-04 | ↓0h,24h     | ↑24h       |
| Nasvi2EG010166t1 | comp14378_c0_seq1  | Transforming protein Ski                                   | 0,53  | 6,74  | 5,05E-05 | ↑0h         | not DE     |
| Nasvi2EG009605t2 | comp32432_c0_seq1  | Tyrosine-protein kinase Src42A, putative                   | -0,51 | 5,82  | 7,88E-04 | ↓0h         | not DE     |
| Nasvi2EG007947t2 | comp39607_c4_seq2  | Guanine nucleotide-binding protein G(q) subunit alpha      | 0,51  | 6,04  | 3,73E-04 | ↑0h         | not DE     |
| Nasvi2EG033203t1 | comp13782_c0_seq1  | cGMP-dependent 3',5'-cyclic phosphodiesterase              | 0,50  | 5,96  | 6,74E-04 | ↑0h         | ↑0h        |
| Nasvi2EG003084t2 | comp26839_c0_seq2  | Reticulon-1                                                | 0,42  | 8,42  | 3,79E-05 | ↑0h         | ↓0h,24h    |
| Nasvi2EG006840t1 | comp40159_c0_seq1  | Nuclear protein 1                                          | -0,38 | 10,11 | 1,01E-06 | ↓0h,4h      | not DE     |
| Nasvi2EG003943t4 | comp27087_c0_seq1  | Myosin heavy chain, muscle                                 | 0,27  | 11,41 | 7,00E-06 | ↑0h ↓24h    | ↓24h       |

--Table S6--

**Differential expression of known memory genes after conditioning.** (a) The gene expression patterns of 78 genes that are known from literature to be involved in (long-term) memory formation were analysed for both species. The number of transcripts that was observed in the transcriptome is given for each gene. Also, the differential expression pattern after conditioning is given, compared to naïve expression levels (not DE = not differentially expressed, n.a. = not available in the transcriptome, ↑ = upregulated, ↓ = downregulated). (b) 37 genes were differentially expressed in *N. vitripennis* (NV) and/or *N. giraulti* (NG) after conditioning. The transcript IDs are given for each transcript that is DE (e.g. ‘comp35553\_c1\_seq4’), but not for other transcripts of the same gene. When none of the transcripts of a gene are DE, the name of the gene is given (e.g. ‘comp28144\_c1’). For each DE transcript, the log<sub>2</sub>-count per million (cpm), log<sub>2</sub>-fold change (FC), and the level of significance (*P*) are given for the time points at which the transcripts are differentially expressed.

**a. Gene expression patterns of 78 known memory genes**

| Gene/<br>transgene                            | Gene description                                 | Reference                 | OGS2.0 ID      | #<br>isoforms |    | DE pattern |          |
|-----------------------------------------------|--------------------------------------------------|---------------------------|----------------|---------------|----|------------|----------|
|                                               |                                                  |                           |                | NV            | NG | NV         | NG       |
| <b>Transcription factors and coactivators</b> |                                                  |                           |                |               |    |            |          |
| <i>CBP/p300</i>                               | CREB binding protein/p300                        | Alberini 2009             | Nasvi2EG004485 | 25            | 2  | ↓ 0h       | not DE   |
| <i>C/EBP</i>                                  | CCAAT-enhancer binding protein                   | Alberini 2009             | Nasvi2EG010468 | 2             | 2  | ↑ 0h       | ↑ 0h     |
| <i>CRTC</i>                                   | CREB-regulated transcription coactivator         | Hirano <i>et al.</i> 2013 | Nasvi2EG020434 | 10            | 15 | not DE     | not DE   |
| <i>dCREB2</i>                                 | cAMP response element binding protein B          | Alberini 2009             | Nasvi2EG004930 | 11            | 9  | not DE     | ↓ 4h,24h |
| <i>dCREBA</i>                                 | cAMP response element binding protein A          | Iyer <i>et al.</i> 2013   | Nasvi2EG009270 | 2             | 1  | not DE     | ↑ 0h     |
| <i>Nalyot</i>                                 | Adh transcription factor 1                       | Keene & Waddell 2007      | Nasvi2EG008127 | 1             | 1  | not DE     | not DE   |
| <i>Stat92E</i>                                | STAT transcription factor                        | Copf <i>et al.</i> 2011   | Nasvi2EG007751 | 2             | 2  | not DE     | not DE   |
| <i>Su(H)</i>                                  | Suppressor of Hairless transcription coactivator | Song <i>et al.</i> 2009   | Nasvi2EG019939 | 3             | 2  | ↑ 0h,4h    | not DE   |
|                                               |                                                  |                           | Nasvi2EG020439 | 4             | 1  | ↑ 0h       | not DE   |
| <b>Translation factors</b>                    |                                                  |                           |                |               |    |            |          |
| <i>eIF-5C</i>                                 | elongation initiation factor-5C                  | Keene & Waddell 2007      | Nasvi2EG002237 | 1             | 1  | ↑ 4h       | ↑ 24h    |

|                |                                             |                        |                |   |   |        |        |
|----------------|---------------------------------------------|------------------------|----------------|---|---|--------|--------|
| <i>Orb2</i>    | cytoplasmic polyadenylation element binding | Pai <i>et al.</i> 2013 | Nasvi2EG015611 | 6 | 5 | ↑ 4h   | not DE |
| <i>Oskar</i>   | translation control                         | Keene & Waddell 2007   | Nasvi2EG013571 | 1 | 1 | not DE | not DE |
| <i>Pumilio</i> | RNA binding protein                         | Keene & Waddell 2007   | Nasvi2EG006115 | 4 | 4 | ↓ 4h   | not DE |

### Protein kinases

|                  |                                                |                               |                |    |    |               |             |
|------------------|------------------------------------------------|-------------------------------|----------------|----|----|---------------|-------------|
| <i>CAMKI</i>     | calcium/calmodulin-dependent protein kinase I  | Schmitt <i>et al.</i> 2005    | Nasvi2EG016557 | 2  | 1  | ↓ 4h          | not DE      |
| <i>CAMKII</i>    | calcium/calmodulin-dependent protein kinase II | Alberini 2009                 | Nasvi2EG036901 | 16 | 16 | not DE        | ↑ 0h,4h,24h |
| <i>CASK</i>      | CASK ortholog                                  | Malik <i>et al.</i> 2013      | Nasvi2EG011836 | 16 | 24 | not DE        | not DE      |
| <i>DCO</i>       | cAMP-dependent protein kinase 1                | Keene & Waddell 2007          | Nasvi2EG014242 | 1  | 1  | not DE        | not DE      |
| <i>ERK-A</i>     | extracellular signal-related kinase            | Alberini 2009                 | Nasvi2EG002789 | 1  | 2  | not DE        | not DE      |
| <i>Foraging</i>  | cGMP dependent protein kinase                  | Mery <i>et al.</i> 2007       | Nasvi2EG004831 | 2  | 2  | not DE        | ↓ 24h       |
| <i>Hopscotch</i> | Janus tyrosine kinase                          | Copf <i>et al.</i> 2011       | Nasvi2EG014300 | 2  | 2  | ↓ 0h          | not DE      |
| <i>Linotte</i>   | RYK receptor tyrosine kinase                   | Keene & Waddell 2007          | Nasvi2EG007570 | 2  | 1  | ↓ 0h          | not DE      |
| <i>p38 MAPK</i>  | p38 mitogen activated protein kinase           | Alberini 2009                 | Nasvi2EG000447 | 8  | 8  | not DE        | not DE      |
| <i>PKA3</i>      | cAMP-dependent protein kinase 3                | da Cruz <i>et al.</i> 2008    | Nasvi2EG011355 | 1  | 1  | ↑ 4h          | ↑ 4h        |
| <i>PKA-R1</i>    | cAMP dependent protein kinase R1               | Keene & Waddell 2007          | Nasvi2EG005068 | 2  | 2  | not DE        | not DE      |
| <i>PKA-R2</i>    | cAMP-dependent protein kinase R2               | Schwaerzel <i>et al.</i> 2007 | Nasvi2EG013246 | 11 | 30 | ↑ 4h,24h ↓ 4h | ↓ 4h        |
| <i>aPKC</i>      | atypical protein kinase C                      | Keene & Waddell 2007          | Nasvi2EG010162 | 5  | 3  | ↑ 4h,24h      | not DE      |
| <i>PKC 53E</i>   | protein C kinase 53E                           | Thiels <i>et al.</i> 2000     | Nasvi2EG009095 | 2  | 2  | not DE        | not DE      |
| <i>PKC 98E</i>   | protein C kinase 98E                           | Zisopoulou <i>et al.</i> 2013 | Nasvi2EG013022 | 2  | 2  | not DE        | not DE      |
| <i>PKC δ</i>     | protein C kinase δ                             | Gallagher <i>et al.</i> 2001  | Nasvi2EG004720 | 9  | 5  | ↑ 4h ↓ 4h     | not DE      |
| <i>Minibrain</i> | tyrosine-phosphorylation-regulated kinase 1A   | Tejedor <i>et al.</i> 1995    | Nasvi2EG003454 | 3  | 4  | not DE        | not DE      |
| <i>Src64B</i>    | Src oncogene at 64B, tyrosine kinase           | Akalal <i>et al.</i> 2011     | Nasvi2EG006407 | 3  | 3  | ↓ 0h          | not DE      |
| <i>S6KII</i>     | ribosomal protein S6 kinase II                 | Keene & Waddell 2007          | Nasvi2EG013142 | 1  | 1  | not DE        | not DE      |

### Receptors and channels

|               |                                       |                           |                |    |    |        |                            |
|---------------|---------------------------------------|---------------------------|----------------|----|----|--------|----------------------------|
| <i>Nmda1</i>  | glutamate receptor-associated protein | Xia <i>et al.</i> 2005    | Nasvi2EG001699 | 2  | 2  | not DE | ↑ 24h                      |
| <i>NMDAR1</i> | glutamate receptor subunit 1          | Keene & Waddell 2007      | Nasvi2EG019393 | 3  | 2  | ↑ 0h   | not DE                     |
| <i>NMDAR2</i> | glutamate receptor subunit 2          | Keene & Waddell 2007      | Nasvi2EG012232 | 6  | 5  | not DE | ↓ 4h                       |
| <i>Notch</i>  | Notch receptor                        | Keene & Waddell 2007      | Nasvi2EG009801 | 3  | 5  | not DE | not DE                     |
| <i>Clumsy</i> | glutamate receptor                    | Riedel <i>et al.</i> 2003 | Nasvi2EG010011 | 12 | 4  | not DE | ↑ 0h,4h,24h<br>↓ 0h,4h,24h |
|               |                                       |                           | Nasvi2EG010019 | 30 | 5  | not DE | ↑ 0h,4h,24h                |
|               |                                       |                           | Nasvi2EG002756 | 7  | 28 | not DE | ↑ 0h,24h                   |

|                 |                                             |                              |                |    |    |        |        |
|-----------------|---------------------------------------------|------------------------------|----------------|----|----|--------|--------|
| <i>GluCl</i>    | glutamate-gated chloride channel            | Liu & Wilson 2013            | Nasvi2EG003037 | 4  | 4  | not DE | not DE |
| <i>GluRIA</i>   | glutamate receptor IA                       | Bevilaqua <i>et al.</i> 2005 | Nasvi2EG000002 | 4  | 4  | not DE | not DE |
| <i>GluRIB</i>   | glutamate receptor IB                       | Bevilaqua <i>et al.</i> 2005 | Nasvi2EG000002 | 4  | 4  | not DE | not DE |
| <i>Damb</i>     | dopamine 1-like receptor 2                  | Keene & Waddell 2007         | Nasvi2EG017876 | 3  | 10 | not DE | not DE |
| <i>dDA1</i>     | dopamine 1-like receptor 1                  | Keene & Waddell 2007         | Nasvi2EG001652 | 8  | 4  | ↓ 4h   | ↓ 4h   |
| <i>Dop2R</i>    | dopamine 2-like receptor                    | Hearn <i>et al.</i> 2002     | Nasvi2EG023476 | 2  | 1  | not DE | not DE |
| <i>DopEcR</i>   | dopamine/ecdysteroid receptor               | Ishimoto <i>et al.</i> 2013  | Nasvi2EG017695 | 1  | 1  | not DE | not DE |
| <i>5-HT1A</i>   | 5-hydroxytryptamine (serotonin) receptor 1A | Johnson <i>et al.</i> 2011   | Nasvi2EG009236 | 1  | 1  | not DE | not DE |
| <i>5-HT1B</i>   | 5-hydroxytryptamine (serotonin) receptor 1B | Johnson <i>et al.</i> 2011   | Nasvi2EG009242 | 1  | 1  | not DE | not DE |
| <i>5-HT2A</i>   | 5-hydroxytryptamine (serotonin) receptor 2A | Johnson <i>et al.</i> 2011   | Nasvi2EG002123 | 0  | 0  | n.a.   | n.a.   |
| <i>5-HT2B</i>   | 5-hydroxytryptamine (serotonin) receptor 2B | Johnson <i>et al.</i> 2011   | Nasvi2EG002123 | 0  | 0  | n.a.   | n.a.   |
| <i>5-HT7</i>    | 5-hydroxytryptamine (serotonin) receptor 7  | Johnson <i>et al.</i> 2011   | Nasvi2EG036914 | 1  | 1  | not DE | not DE |
| <i>Oamb</i>     | Octopamine receptor in mushroom bodies      | Keene & Waddell 2007         | Nasvi2EG003445 | 1  | 2  | not DE | not DE |
| <i>Octβ2R</i>   | octopamine β2 receptor                      | Burke <i>et al.</i> 2012     | Nasvi2EG001703 | 14 | 15 | not DE | not DE |
| <i>Oct-TyrR</i> | octopamine-tyramine receptor                | Nagaya <i>et al.</i> 2002    | Nasvi2EG001406 | 1  | 1  | not DE | not DE |
| <i>TyrR</i>     | tyramine receptor                           | Homborg <i>et al.</i> 2013   | Nasvi2EG002052 | 2  | 1  | not DE | not DE |
| <i>Volado</i>   | α-integrin                                  | Keene & Waddell 2007         | Nasvi2EG012335 | 2  | 1  | not DE | not DE |
| <i>Eag</i>      | ether a go-go, potassium channel            | Griffith <i>et al.</i> 1994  | Nasvi2EG005885 | 18 | 20 | not DE | not DE |
| <i>Brp</i>      | bruchpilot, calcium channel                 | Knapek <i>et al.</i> 2011    | Nasvi2EG000461 | 4  | 9  | not DE | not DE |

### Neurotransmitter synthesis

|             |                           |                           |                |   |    |            |        |
|-------------|---------------------------|---------------------------|----------------|---|----|------------|--------|
| <i>Ddc</i>  | dopa decarboxylase        | Meiser <i>et al.</i> 2013 | Nasvi2EG002599 | 1 | 1  | not DE     | not DE |
| <i>Pale</i> | tyrosine 3-monooxygenase  | Meiser <i>et al.</i> 2013 | Nasvi2EG022898 | 1 | 1  | ↑ 4h ↓ 24h | ↓ 24h  |
| <i>Tbh</i>  | tyramine beta-hydroxylase | Keene & Waddell 2007      | Nasvi2EG012708 | 1 | 1  | not DE     | not DE |
| <i>Tdc1</i> | tyrosine decarboxylase 1  | Meiser <i>et al.</i> 2013 | Nasvi2EG021102 | 4 | 18 | not DE     | ↓ 24h  |

### Phosphatases, phosphodiesterases, proteases

|                  |                               |                           |                |    |    |          |        |
|------------------|-------------------------------|---------------------------|----------------|----|----|----------|--------|
| <i>Corkscrew</i> | SHP2 phosphatase              | Pagani <i>et al.</i> 2009 | Nasvi2EG012844 | 2  | 2  | ↑ 4h     | not DE |
| <i>Crammer</i>   | trans-inhibitor of cathepsins | Keene & Waddell 2007      | Nasvi2EG034880 | 2  | 1  | ↓ 4h,24h | ↓ 4h   |
| <i>Dunce</i>     | cAMP phosphodiesterase        | Keene & Waddell 2007      | Nasvi2EG011498 | 10 | 13 | ↑ 4h     | ↓ 4h   |
| <i>Tequila</i>   | neurotrypsin                  | Keene & Waddell 2007      | Nasvi2EG010908 | 5  | 4  | ↓ 4h     | not DE |

### GTPases and GTPase activating proteins

|                |                       |                      |                |   |   |       |        |
|----------------|-----------------------|----------------------|----------------|---|---|-------|--------|
| <i>G-sa60A</i> | stimulatory G protein | Keene & Waddell 2007 | Nasvi2EG010676 | 2 | 1 | ↑ 24h | not DE |
|----------------|-----------------------|----------------------|----------------|---|---|-------|--------|

|                    |                                      |                             |                |    |    |             |                    |
|--------------------|--------------------------------------|-----------------------------|----------------|----|----|-------------|--------------------|
| <i>NF1</i>         | Ras GTPase activating protein        | Keene & Waddell 2007        | Nasvi2EG011800 | 4  | 7  | not DE      | ↑ 24h              |
| <i>Rac1</i>        | Rho family GTPase                    | Shuai <i>et al.</i> 2010    | Nasvi2EG000948 | 1  | 1  | not DE      | not DE             |
| <i>Radish</i>      | Rap GTPase activating protein        | Keene & Waddell 2007        | Nasvi2EG000376 | 2  | 2  | not DE      | not DE             |
| <b>Other genes</b> |                                      |                             |                |    |    |             |                    |
| <i>Armitage</i>    | RNA helicase (SDE3)                  | Keene & Waddell 2007        | Nasvi2EG003373 | 4  | 1  | ↓ 4h        | not DE             |
| <i>Fasciclin 1</i> | neural cell adhesion molecule        | Eickhoff & Bicker 2012      | Nasvi2EG020485 | 6  | 4  | not DE      | ↓ 24h              |
| <i>Fasciclin 2</i> | neural cell adhesion molecule        | Keene & Waddell 2007        | Nasvi2EG000400 | 6  | 6  | ↑ 0h,4h,24h | not DE<br>↑ 4h,24h |
| <i>Fasciclin 3</i> | neural cell adhesion molecule        | Dubnau <i>et al.</i> 2003   | Nasvi2EG003598 | 10 | 11 | ↓ 0h        | ↓ 4h,24h           |
| <i>FMRP</i>        | fragile X mental retardation protein | Banerjee <i>et al.</i> 2010 | Nasvi2EG013697 | 8  | 8  | ↑ 0h        | not DE             |
| <i>Latheo</i>      | origin recognition complex           | Keene & Waddell 2007        | Nasvi2EG008683 | 1  | 1  | not DE      | not DE             |
| <i>Leonardo</i>    | 14-3-3 zeta protein                  | Keene & Waddell 2007        | Nasvi2EG004640 | 1  | 1  | not DE      | not DE             |
| <i>Sarah</i>       | calcineurin inhibitor                | Keene & Waddell 2007        | Nasvi2EG014610 | 5  | 5  | not DE      | not DE             |
| <i>Rutabaga</i>    | adenylyl cyclase (type 2)            | Keene & Waddell 2007        | Nasvi2EG013346 | 2  | 5  | not DE      | not DE             |
| <i>Staufen</i>     | mRNA translocation                   | Keene & Waddell 2007        | Nasvi2EG013994 | 3  | 2  | ↓ 0h        | not DE             |
| <i>Synapsin</i>    | presynaptic vesicle protein          | Keene & Waddell 2007        | Nasvi2EG017400 | 4  | 4  | not DE      | not DE             |

### b. Information on 37 DE memory genes

| <i>N. vitripennis</i> |                    |           |          |         |          | <i>N. giraulti</i>                |           |          |          |          |
|-----------------------|--------------------|-----------|----------|---------|----------|-----------------------------------|-----------|----------|----------|----------|
| Gene                  | Transcript ID      | Timepoint | Log2-CPM | Log2-FC | <i>P</i> | Transcript ID                     | Timepoint | Log2-cpm | Log2-FC  | <i>P</i> |
| <i>aPKC</i>           | comp35553_c1_seq4  | ↑ 4h      | 3,88     | 1,07    | 9,73E-04 | comp28144_c1                      | not DE    | n.a.     | n.a.     | n.a.     |
|                       |                    | ↑ 24h     | 3,88     | 0,99    | 2,09E-03 |                                   |           |          |          |          |
| <i>Armitage</i>       | comp36728_c0_seq1  | ↓ 4h      | 5,07     | -0,78   | 1,62E-04 | comp50069_c0                      | not DE    | n.a.     | n.a.     | n.a.     |
| <i>C/EBP</i>          | comp14353_c1_seq1  | ↑ 0h      | 2,23     | 1,89    | 4,99E-04 | comp37628_c0_seq1                 | ↑ 0h      | 4,42     | 1,76     | 6,46E-09 |
|                       |                    | not DE    | n.a.     | n.a.    | n.a.     | comp22968_c1                      | not DE    | n.a.     | n.a.     | n.a.     |
| <i>CAMKI</i>          | comp35899_c3_seq1  | ↓ 4h      | 5,24     | -0,62   | 8,17E-04 | comp31541_c2                      | not DE    | n.a.     | n.a.     | n.a.     |
| <i>CAMKII</i>         | comp38849_c3       | not DE    | n.a.     | n.a.    | n.a.     | comp34936_c1_seq35                | ↑ 0h      | -0,78    | 7,56     | 4,91E-04 |
|                       |                    |           |          |         |          | ↑ 4h                              | -0,78     | 9,81     | 1,09E-06 |          |
|                       |                    |           |          |         |          | ↑ 24h                             | -0,78     | 7,62     | 3,86E-04 |          |
| <i>CBP/p300</i>       | comp39271_c0_seq35 | ↓ 0h      | 0,80     | -2,60   | 2,14E-04 | comp32931_c2                      | not DE    | n.a.     | n.a.     | n.a.     |
| <i>Clumsy</i>         | comp37853_c2       | not DE    | n.a.     | n.a.    | n.a.     | comp35273_c1_seq12 <sup>(1)</sup> | ↓ 0h      | 3,39     | -1,67    | 1,71E-05 |
|                       |                    | not DE    | n.a.     | n.a.    | n.a.     | ↓ 4h                              | 3,39      | -1,73    | 1,36E-05 |          |



|                    |                    |        |      |        |          |                                   |        |       |       |          |
|--------------------|--------------------|--------|------|--------|----------|-----------------------------------|--------|-------|-------|----------|
|                    | comp38794_c0       | not DE | n.a. | n.a.   | n.a.     |                                   | ↓ 24h  | 3,39  | -1,90 | 1,30E-06 |
|                    | comp39218_c1       | not DE | n.a. | n.a.   | n.a.     | comp35273_c1_seq28 <sup>(2)</sup> | ↑ 0h   | 4,02  | 1,63  | 4,58E-06 |
|                    |                    |        |      |        |          |                                   | ↑ 4h   | 4,02  | 1,86  | 3,28E-07 |
|                    |                    |        |      |        |          |                                   | ↑ 24h  | 4,02  | 1,81  | 1,40E-06 |
|                    |                    |        |      |        |          | comp35273_c1_seq37 <sup>(3)</sup> | ↑ 0h   | 2,75  | 1,89  | 2,00E-04 |
|                    |                    |        |      |        |          |                                   | ↑ 24h  | 2,75  | 1,77  | 4,97E-04 |
|                    |                    |        |      |        |          | comp33862_c0                      | not DE | n.a.  | n.a.  | n.a.     |
|                    |                    |        |      |        |          | comp33955_c0                      | not DE | n.a.  | n.a.  | n.a.     |
| <i>Corkscrew</i>   | comp32621_c0_seq1  | ↑ 4h   | 7,17 | 0,49   | 5,03E-05 | comp27751_c0                      | not DE | n.a.  | n.a.  | n.a.     |
| <i>Crammer</i>     | comp32552_c0_seq1  | ↓ 4h   | 8,44 | -0,81  | 2,09E-15 | comp21791_c0_seq1                 | ↓ 4h   | 7,15  | -0,71 | 1,48E-05 |
|                    |                    | ↓ 24h  | 8,44 | -0,57  | 1,72E-08 |                                   |        |       |       |          |
| <i>dCREB2</i>      | comp38103_c1       | not DE | n.a. | n.a.   | n.a.     | comp32151_c0_seq1                 | ↓ 4h   | 2,27  | -3,67 | 1,24E-05 |
|                    |                    |        |      |        |          |                                   | ↓ 24h  | 2,27  | -6,19 | 8,08E-14 |
| <i>dCREBA</i>      | comp37729_c7       | not DE | n.a. | n.a.   | n.a.     | comp21911_c1_seq1                 | ↑ 0h   | 5,45  | 0,77  | 2,46E-04 |
| <i>dDA1</i>        | comp37078_c0_seq2  | ↓ 4h   | 2,89 | -1,38  | 1,79E-03 | comp32875_c0_seq2                 | ↓ 4h   | 2,44  | -4,38 | 8,59E-12 |
| <i>Dunce</i>       | comp32729_c1_seq5  | ↑ 4h   | 5,71 | 0,64   | 3,83E-05 | comp34739_c4_seq3                 | ↓ 4h   | 5,36  | -0,76 | 4,53E-04 |
| <i>eIF-5C</i>      | comp40716_c0_seq1  | ↑ 4h   | 7,66 | 0,40   | 3,71E-04 | comp36025_c0_seq1                 | ↑ 24h  | 7,24  | 0,57  | 4,37E-04 |
| <i>Fasciclin 1</i> | comp39514_c1       | not DE | n.a. | n.a.   | n.a.     | comp34589_c0_seq1                 | ↓ 24h  | 5,68  | -0,67 | 7,61E-04 |
| <i>Fasciclin 2</i> | comp34025_c1_seq3  | ↑ 0h   | 5,59 | 0,63   | 1,03E-04 | comp32884_c1                      | not DE | n.a.  | n.a.  | n.a.     |
|                    |                    | ↑ 4h   | 5,59 | 0,68   | 2,39E-05 |                                   |        |       |       |          |
|                    |                    | ↑ 24h  | 5,59 | 0,62   | 1,15E-04 |                                   |        |       |       |          |
| <i>Fasciclin 3</i> | comp37859_c0_seq14 | ↓ 0h   | 1,54 | -10,95 | 1,39E-15 | comp32890_c0_seq8 <sup>(1)</sup>  | ↑ 4h   | 1,86  | 3,19  | 2,52E-07 |
|                    |                    |        |      |        |          |                                   | ↑ 24h  | 1,86  | 2,53  | 2,91E-05 |
|                    |                    |        |      |        |          | comp32890_c0_seq10 <sup>(2)</sup> | ↑ 4h   | 1,90  | 2,66  | 5,61E-06 |
|                    |                    |        |      |        |          |                                   | ↑ 24h  | 1,90  | 2,14  | 2,66E-04 |
|                    |                    |        |      |        |          | comp32890_c0_seq12 <sup>(3)</sup> | ↓ 24h  | 4,00  | -1,04 | 1,76E-03 |
|                    |                    |        |      |        |          | comp32890_c0_seq13 <sup>(4)</sup> | ↑ 4h   | -0,27 | 3,66  | 3,21E-04 |
|                    |                    |        |      |        |          | comp32890_c0_seq15 <sup>(5)</sup> | ↓ 4h   | 2,82  | -1,63 | 5,11E-04 |
| <i>FMRP</i>        | comp34913_c0_seq6  | ↑ 0h   | 5,12 | 0,67   | 6,65E-04 | comp30902_c0                      | not DE | n.a.  | n.a.  | n.a.     |
| <i>Foraging</i>    | comp27264_c0       | not DE | n.a. | n.a.   | n.a.     | comp22710_c0_seq2                 | ↓ 24h  | 4,03  | -1,05 | 1,72E-03 |
| <i>G-sa60A</i>     | comp35901_c1_seq2  | ↑ 24h  | 0,05 | 3,62   | 2,05E-04 | comp18726_c0                      | not DE | n.a.  | n.a.  | n.a.     |
| <i>Hopscotch</i>   | comp25200_c0_seq2  | ↓ 0h   | 2,30 | -2,92  | 7,40E-07 | comp22884_c0                      | not DE | n.a.  | n.a.  | n.a.     |
| <i>Linotte</i>     | comp33720_c1_seq2  | ↓ 0h   | 1,24 | -5,95  | 2,78E-07 | comp19883_c0                      | not DE | n.a.  | n.a.  | n.a.     |
| <i>NF1</i>         | comp32412_c0       | not DE | n.a. | n.a.   | n.a.     | comp33011_c0_seq3 <sup>(1)</sup>  | ↑ 24h  | 3,83  | 1,78  | 7,03E-06 |
|                    |                    |        |      |        |          | comp33011_c0_seq5 <sup>(2)</sup>  | ↑ 24h  | 3,03  | 2,15  | 2,41E-06 |

|                |                                   |        |       |       |          |                                  |        |      |       |          |
|----------------|-----------------------------------|--------|-------|-------|----------|----------------------------------|--------|------|-------|----------|
|                |                                   |        |       |       |          | comp33011_c0_seq6 <sup>(3)</sup> | ↑ 24h  | 5,08 | 1,99  | 7,32E-15 |
| <i>Nmda1</i>   | comp13931_c0                      | not DE | n.a.  | n.a.  | n.a.     | comp21393_c0_seq1                | ↑ 24h  | 4,74 | 0,82  | 2,25E-03 |
| <i>NMDAR1</i>  | comp39881_c3_seq1                 | ↑ 0h   | -0,44 | 4,20  | 5,82E-04 | comp22369_c0                     | not DE | n.a. | n.a.  | n.a.     |
| <i>NMDAR2</i>  | comp39633_c6                      | not DE | n.a.  | n.a.  | n.a.     | comp30975_c0_seq3                | ↓ 4h   | 0,74 | -2,31 | 9,22E-04 |
| <i>Orb2</i>    | comp38340_c1_seq3                 | ↑ 4h   | 2,95  | 2,34  | 2,27E-07 | comp32650_c0                     | not DE | n.a. | n.a.  | n.a.     |
| <i>Pale</i>    | comp14977_c0_seq1                 | ↑ 4h   | 7,32  | 0,51  | 1,92E-05 | comp29518_c0_seq1                | ↓ 24h  | 5,56 | -1,74 | 3,56E-16 |
|                |                                   | ↓ 24h  | 7,32  | -1,49 | 1,88E-33 |                                  |        |      |       |          |
| <i>PKA3</i>    | comp15756_c0_seq1                 | ↑ 4h   | 3,74  | 1,12  | 3,90E-04 | comp39532_c0_seq1                | ↑ 4h   | 5,86 | 1,02  | 8,81E-08 |
| <i>PKA-R2</i>  | comp36737_c1_seq3 <sup>(1)</sup>  | ↑ 24h  | 5,79  | 0,50  | 1,09E-03 | comp34612_c3_seq35               | ↓ 4h   | 5,86 | -0,67 | 4,52E-04 |
|                | comp36737_c1_seq4 <sup>(2)</sup>  | ↑ 4h   | 3,50  | 1,41  | 6,27E-05 |                                  |        |      |       |          |
|                | comp36737_c1_seq9 <sup>(3)</sup>  | ↑ 4h   | 6,42  | 0,75  | 3,10E-08 |                                  |        |      |       |          |
|                |                                   | ↑ 24h  | 6,42  | 0,56  | 4,04E-05 |                                  |        |      |       |          |
|                | comp36737_c1_seq10 <sup>(4)</sup> | ↓ 4h   | 6,22  | -0,57 | 4,61E-05 |                                  |        |      |       |          |
|                | comp36737_c1_seq11 <sup>(5)</sup> | ↑ 4h   | 6,68  | 0,44  | 6,30E-04 |                                  |        |      |       |          |
| <i>PKC δ</i>   | comp36706_c0_seq9 <sup>(1)</sup>  | ↓ 4h   | 0,47  | -2,41 | 1,78E-03 | comp33557_c0                     | not DE | n.a. | n.a.  | n.a.     |
|                | comp36706_c0_seq12 <sup>(2)</sup> | ↑ 4h   | 0,99  | 2,11  | 9,45E-04 |                                  |        |      |       |          |
| <i>Pumilio</i> | comp38467_c2_seq2                 | ↓ 4h   | 6,06  | -0,60 | 3,05E-05 | comp28801_c0                     | not DE | n.a. | n.a.  | n.a.     |
| <i>Src64B</i>  | comp35269_c1_seq1                 | ↓ 0h   | 0,16  | -3,39 | 8,61E-04 | comp32598_c1                     | not DE | n.a. | n.a.  | n.a.     |
| <i>Staufen</i> | comp32934_c0_seq2                 | ↓ 0h   | 4,19  | -1,51 | 3,38E-07 | comp29323_c0                     | not DE | n.a. | n.a.  | n.a.     |
| <i>Su(H)</i>   | comp35504_c1_seq1 <sup>(1)</sup>  | ↑ 0h   | 4,08  | 1,01  | 7,87E-04 | comp25570_c0                     | not DE | n.a. | n.a.  | n.a.     |
|                |                                   | ↑ 4h   | 4,08  | 1,07  | 3,82E-04 | comp21669_c1                     | not DE | n.a. | n.a.  | n.a.     |
|                | comp35504_c1_seq2 <sup>(2)</sup>  | ↑ 0h   | -0,41 | 4,50  | 1,80E-04 |                                  |        |      |       |          |
|                | comp25453_c1                      | not DE | n.a.  | n.a.  | n.a.     |                                  |        |      |       |          |
| <i>Tdc1</i>    | comp38213_c2                      | not DE | n.a.  | n.a.  | n.a.     | comp35179_c0_seq7                | ↓ 24h  | 0,23 | -3,72 | 8,61E-05 |
|                |                                   |        |       |       |          | comp35148_c0                     | not DE | n.a. | n.a.  | n.a.     |
| <i>Tequila</i> | comp36628_c1_seq1                 | ↓ 4h   | 4,54  | -1,60 | 9,32E-10 | comp31122_c2                     | not DE | n.a. | n.a.  | n.a.     |

## References

- Akalal DBG, Yu DH, Davis RL (2011) The long-term memory trace formed in the *Drosophila*  $\alpha/\beta$  mushroom body neurons is abolished in long-term memory mutants. *Journal of Neuroscience* **31**, 5643-5647.
- Alberini CM (2009) Transcription factors in long-term memory and synaptic plasticity. *Physiological Reviews* **89**, 121-145.

- Banerjee P, Schoenfeld BP, Bell AJ, *et al.* (2010) Short- and long-term memory are modulated by multiple isoforms of the fragile X mental retardation protein. *Journal of Neuroscience* **30**, 6782-6792.
- Bevilaqua LR, Medina JH, Izquierdo I, Cammarota M (2005) Memory consolidation induces n-methyl-d-aspartic acid-receptor- and Ca<sup>2+</sup>/calmodulin-dependent protein kinase II-dependent modifications in alpha-amino-3-hydroxy-5-methylisoxazole-4-propionic acid receptor properties. *Neuroscience* **136**, 397-403.
- Burke CJ, Huetteroth W, Oswald D, *et al.* (2012) Layered reward signalling through octopamine and dopamine in *Drosophila*. *Nature* **492**, 433-437.
- Copf T, Goguel V, Lampin-Saint-Amaux A, Scaplehorn N, Preat T (2011) Cytokine signaling through the JAK/STAT pathway is required for long-term memory in *Drosophila*. *Proceedings of the National Academy of Sciences of the United States of America* **108**, 8059-8064.
- da Cruz AB, Wentzell J, Kretschmar D (2008) Swiss cheese, a protein involved in progressive neurodegeneration, acts as a noncanonical regulatory subunit for PKA-C3. *Journal of Neuroscience* **28**, 10885-10892.
- Dubnau J, Chiang AS, Grady L, *et al.* (2003) The staufen/pumilio pathway is involved in *Drosophila* long-term memory. *Current Biology* **13**, 286-296.
- Eickhoff R, Bicker G (2012) Developmental expression of cell recognition molecules in the mushroom body and antennal lobe of the locust *Locusta migratoria*. *Journal of comparative neurology* **520**, 2021-2040.
- Gallagher HC, Murphy KJ, Foley AG, Regan CM (2001) Protein kinase C  $\delta$  regulates neural cell adhesion molecule polysialylation state in the rat brain. *Journal of Neurochemistry* **77**, 425-434.
- Griffith LC, Wang J, Zhong Y, Wu CF, Greenspan RJ (1994) Calcium/calmodulin-dependent protein kinase II and potassium channel subunit EAG similarly affect plasticity in *Drosophila*. *Proceedings of the National Academy of Sciences of the United States of America* **91**, 10044-10048.
- Hearn MG, Ren Y, McBride EW, *et al.* (2002) A *Drosophila* dopamine 2-like receptor: Molecular characterization and identification of multiple alternatively spliced variants. *Proceedings of the National Academy of Sciences of the United States of America* **99**, 14554-14559.

- Hirano Y, Masuda T, Naganos S, *et al.* (2013) Fasting launches CRTC to facilitate long-term memory formation in *Drosophila*. *Science* **339**, 443-446.
- Homberg U, Seyfarth J, Binkle U, Monastirioti M, Alkema MJ (2013) Identification of distinct tyraminerpic and octopaminergic neurons innervating the central complex of the desert locust, *Schistocerca gregaria*. *Journal of comparative neurology* **521**, 2025-2041.
- Ishimoto H, Wang Z, Rao Y, Wu CF, Kitamoto T (2013) A novel role for ecdysone in *Drosophila* conditioned behavior: linking GPCR-mediated non-canonical steroid action to cAMP signaling in the adult brain. *PLoS Genetics* **9**, e1003843.
- Iyer SC, Iyer EPR, Meduri R, *et al.* (2013) Cut, via CrebA, transcriptionally regulates the COPII secretory pathway to direct dendrite development in *Drosophila*. *Journal of Cell Science* **126**, 4732-4745.
- Johnson O, Becnel J, Nichols CD (2011) Serotonin receptor activity is necessary for olfactory learning and memory in *Drosophila melanogaster*. *Neuroscience* **192**, 372-381.
- Keene AC, Waddell S (2007) *Drosophila* olfactory memory: single genes to complex neural circuits. *Nature Reviews Neuroscience* **8**, 341-354.
- Knappek S, Sigrist S, Tanimoto H (2011) Bruchpilot, a synaptic active zone protein for anesthesia-resistant memory. *Journal of Neuroscience* **31**, 3453-3458.
- Liu WW, Wilson RI (2013) Glutamate is an inhibitory neurotransmitter in the *Drosophila* olfactory system. *Proceedings of the National Academy of Sciences of the United States of America* **110**, 10294-10299.
- Malik BR, Gillespie JM, Hodge JJJ (2013) CASK and CaMKII function in the mushroom body  $\alpha'/\beta'$  neurons during *Drosophila* memory formation. *Frontiers in Neural Circuits* **7**, 52.
- Meiser J, Weindl D, Hiller K (2013) Complexity of dopamine metabolism. *Cell Communication and Signaling* **11**, 34.
- Mery F, Belay AT, So AKC, Sokolowski MB, Kawecki TJ (2007) Natural polymorphism affecting learning and memory in *Drosophila*. *Proceedings of the National Academy of Sciences of the United States of America* **104**, 13051-13055.

- Nagaya Y, Kutsukake M, Chigusa SI, Komatsu A (2002) A trace amine, tyramine, functions as a neuromodulator in *Drosophila melanogaster*. *Neuroscience Letters* **329**, 324-328.
- Pagani MR, Oishi K, Gelb BD, Zhong Y (2009) The phosphatase SHP2 regulates the spacing effect for long-term memory induction. *Cell* **139**, 186-198.
- Pai TP, Chen CC, Lin HH, *et al.* (2013) *Drosophila* ORB protein in two mushroom body output neurons is necessary for long-term memory formation. *Proceedings of the National Academy of Sciences of the United States of America* **110**, 7898-7903.
- Riedel G, Platt B, Micheau J (2003) Glutamate receptor function in learning and memory. *Behavioural Brain Research* **140**, 1-47.
- Schmitt JM, Guire ES, Saneyoshi T, Soderling TR (2005) Calmodulin-dependent kinase kinase/calmodulin kinase I activity gates extracellular-regulated kinase-dependent long-term potentiation. *Journal of Neuroscience* **25**, 1281-1290.
- Schwaerzel M, Jaeckel A, Mueller U (2007) Signaling at A-kinase anchoring proteins organizes anesthesia-sensitive memory in *Drosophila*. *Journal of Neuroscience* **27**, 1229-1233.
- Shuai YC, Lu BY, Hu Y, *et al.* (2010) Forgetting is regulated through Rac activity in *Drosophila*. *Cell* **140**, 579-589.
- Song QX, Sun K, Shuai Y, *et al.* (2009) Suppressor of Hairless is required for long-term memory formation in *Drosophila*. *Journal of Neurogenetics* **23**, 405-411.
- Tejedor F, Zhu XR, Kaltenbach E, *et al.* (1995) Minibrain: a new protein kinase family involved in postembryonic neurogenesis in *Drosophila*. *Neuron* **14**, 287-301.
- Thiels E, Kanterewicz BI, Knapp LT, Barrionuevo G, Klann E (2000) Protein phosphatase-mediated regulation of protein kinase C during long-term depression in the adult hippocampus in vivo. *Journal of Neuroscience* **20**, 7199-7207.
- Xia S, Miyashita T, Fu T-F, *et al.* (2005) NMDA receptors mediate olfactory learning and memory in *Drosophila*. *Current Biology* **15**, 603-615.
- Zisopoulou S, Asimaki O, Leondaritis G, *et al.* (2013) PKC- $\epsilon$  activation is required for recognition memory in the rat. *Behavioural Brain Research* **253**, 280-289.

--Table S7--

**Differentially expressed genes with an opposed expression pattern after conditioning in *N. vitripennis* and *N. giraulti*.** (a) Genes of which all transcript variants have an opposed expression pattern between the two *Nasonia* species are given (↑ = upregulated, ↓ = downregulated). For each DE transcript, the log2-count per million (cpm), log2-fold change (FC), and the level of significance (*P*) are given for the time points at which the transcripts are differentially expressed. (b) GO enrichment analyses of the genes with an opposed expression pattern was done using Blast2go (Fisher's exact test, *P* < 0.05). The two categories of antisense transcripts were analysed separately: 'antisense2protein' transcripts that have a hit to a *N. vitripennis* protein and 'antisense2sense' transcripts that have a hit to a sense transcript only. Generic GOSlim categories and the Blast2go option 'reduce to most specific terms' were used to limit the number of GO term categories. The enriched GO terms (GO ID and Term), the category of the GO term (C = cellular component, F = molecular function, P = biological process), their *P*-value and the number of genes in the test-set and the reference-set are given.

**a. Genes with an opposing expression pattern between *N. vitripennis* and *N. giraulti***

| OGS 2.0 ID     | Gene description                  | <i>N. vitripennis</i> |            |          |         | <i>N. giraulti</i> |                   |                   |          |         |          |
|----------------|-----------------------------------|-----------------------|------------|----------|---------|--------------------|-------------------|-------------------|----------|---------|----------|
|                |                                   | Transcript ID         | Time-point | Log2-CPM | Log2-FC | <i>P</i>           | Transcript ID     | Time-point        | Log2-CPM | Log2-FC | <i>P</i> |
| Nasvi2EG000127 | Proton-coupled folate transporter | comp13904_c0_seq1     | ↑0h        | 6,7069   | 0,5311  | 5,09E-05           | comp28717_c0_seq2 | ↓24h              | 2,4579   | -2,0411 | 3,50E-04 |
|                |                                   |                       | ↑4h        | 6,7069   | 0,5510  | 2,42E-05           |                   |                   |          |         |          |
|                |                                   |                       | ↑24h       | 6,7069   | 0,4297  | 1,01E-03           |                   |                   |          |         |          |
| Nasvi2EG000216 | Purine nucleoside phosphorylase   | comp40525_c0_seq1     | ↑4h        | 8,7895   | 0,3614  | 1,79E-04           | comp35798_c0_seq1 | ↓4h               | 7,9386   | -0,7106 | 8,97E-06 |
|                |                                   |                       |            |          |         |                    |                   | ↓24h              | 7,9386   | -0,6574 | 4,46E-05 |
| Nasvi2EG000732 | Cytochrome P450 4C1               | comp40995_c0_seq1     | ↑24h       | 4,6076   | 0,7762  | 1,75E-03           | comp38976_c0_seq1 | ↓4h               | 6,7087   | -0,7252 | 1,79E-05 |
| Nasvi2EG000852 | Aquaporin AQPAn.G                 | comp36203_c2_seq1     | ↑4h        | 7,5213   | 0,4635  | 6,41E-05           | comp31207_c1_seq2 | ↓24h              | 7,5715   | -0,5738 | 3,44E-04 |
|                |                                   |                       |            |          |         |                    |                   | comp31207_c1_seq3 | ↓24h     | 8,3098  | -0,6180  |

|                |                                                     |                     |      |        |        |          |                    |      |         |         |          |
|----------------|-----------------------------------------------------|---------------------|------|--------|--------|----------|--------------------|------|---------|---------|----------|
|                |                                                     |                     |      |        |        |          | comp31207_c1_seq6  | ↓24h | 2,9405  | -1,9054 | 4,42E-05 |
| Nasvi2EG001309 | Unknown                                             | comp37153_c0_seq6   | ↑24h | 6,0878 | 0,4611 | 1,20E-03 | comp30474_c0_seq1  | ↓4h  | 6,1580  | -0,6405 | 4,02E-04 |
|                |                                                     | comp37153_c0_seq2   | ↑24h | 7,0832 | 0,4216 | 6,38E-04 |                    | ↓24h | 6,1580  | -0,7439 | 4,35E-05 |
|                |                                                     |                     |      |        |        |          | comp30474_c0_seq5  | ↓4h  | 3,8013  | -2,9271 | 2,33E-14 |
| Nasvi2EG001615 | Spectrin, beta chain                                | comp39193_c2_seq10  | ↑0h  | 3,6436 | 1,4334 | 2,56E-05 | comp32657_c0_seq10 | ↓4h  | 5,9936  | -0,6304 | 6,86E-04 |
| Nasvi2EG003098 | Maleylacetoacetate isomerase 2                      | comp37898_c3_seq5   | ↑0h  | 1,7246 | 3,1754 | 1,03E-05 | comp37698_c0_seq1  | ↓4h  | 6,6049  | -0,7011 | 4,05E-05 |
|                |                                                     |                     | ↑24h | 1,7246 | 4,2428 | 1,96E-07 |                    | ↓24h | 6,6049  | -0,5551 | 1,16E-03 |
| Nasvi2EG003481 | Muscle-specific protein                             | comp39798_c0_seq34  | ↑0h  | 3,8536 | 1,0416 | 8,85E-04 | comp34922_c0_seq71 | ↓24h | 3,1213  | -1,9486 | 8,17E-05 |
|                |                                                     | comp39798_c0_seq14  | ↑24h | 4,0107 | 0,9969 | 8,80E-04 |                    |      |         |         |          |
|                |                                                     | comp39798_c0_seq32  | ↑24h | 4,0594 | 0,9612 | 1,13E-03 |                    |      |         |         |          |
| Nasvi2EG003488 | Xanthine dehydrogenase                              | comp41097_c0_seq1   | ↑4h  | 7,7478 | 0,4003 | 3,61E-04 | comp18900_c0_seq1  | ↓4h  | 7,5104  | -0,6998 | 1,24E-05 |
|                |                                                     |                     |      |        |        |          |                    | ↓24h | 7,5104  | -0,6908 | 1,67E-05 |
| Nasvi2EG004756 | snRNA-activating protein complex, subunit 1         | comp38773_c0_seq14  | ↑4h  | 1,0423 | 3,0467 | 2,81E-05 | comp34285_c0_seq1  | ↓4h  | 0,9164  | -0,0080 | 9,89E-01 |
| Nasvi2EG006622 | Fem-1 protein A                                     | comp31321_c0_seq3   | ↑0h  | 3,4337 | 1,2399 | 3,01E-04 | comp33585_c2_seq5  | ↓0h  | 4,7568  | -1,1566 | 2,01E-05 |
| Nasvi2EG006723 | Sulfotransferase family cytosolic 1B member         | comp39757_c16_seq16 | ↑0h  | 0,3092 | 4,4642 | 1,37E-05 | comp34937_c1_seq61 | ↓24h | -0,5635 | -4,6934 | 1,73E-04 |
|                |                                                     |                     | ↑4h  | 0,3092 | 2,8306 | 1,42E-03 |                    |      |         |         |          |
| Nasvi2EG006827 | Endothelin-converting enzyme 1                      | comp39911_c0_seq2   | ↑4h  | 7,0332 | 0,4094 | 9,74E-04 | comp34987_c1_seq13 | ↓0h  | 4,9543  | -0,8763 | 4,98E-04 |
| Nasvi2EG007296 | Furry                                               | comp35259_c0_seq2   | ↑4h  | 5,7147 | 0,5322 | 5,11E-04 | comp31740_c0_seq10 | ↓24h | 1,3000  | -2,6760 | 3,28E-05 |
|                |                                                     |                     |      |        |        |          | comp31740_c0_seq13 | ↓24h | 2,5558  | -2,4910 | 1,54E-05 |
|                |                                                     |                     |      |        |        |          | comp31740_c0_seq16 | ↓24h | 1,6094  | -2,0402 | 9,37E-04 |
| Nasvi2EG007947 | Guanine nucleotide-binding protein G, subunit alpha | comp39607_c4_seq2   | ↑0h  | 6,0399 | 0,5101 | 3,73E-04 | comp34920_c5_seq3  | ↓24h | 1,4566  | -2,5243 | 2,73E-05 |
| Nasvi2EG008711 | Bifunctional purine biosynthesis protein PURH       | comp40780_c0_seq1   | ↑4h  | 7,1800 | 1,5877 | 1,94E-37 | comp36134_c0_seq1  | ↓0h  | 6,9850  | -0,5949 | 3,11E-04 |
| Nasvi2EG008828 | Unknown                                             | comp38853_c1_seq6   | ↑0h  | 1,4130 | 2,3081 | 1,87E-04 | comp34206_c1_seq1  | ↓24h | 0,4649  | -9,6315 | 5,56E-09 |
|                |                                                     |                     | ↑4h  | 1,4130 | 1,9996 | 1,00E-03 | comp34206_c1_seq11 | ↓24h | -0,4594 | -8,4590 | 1,87E-05 |
|                |                                                     |                     |      |        |        |          | comp34206_c1_seq2  | ↓24h | -0,0084 | -8,8410 | 1,92E-06 |
|                |                                                     |                     |      |        |        |          | comp34206_c1_seq4  | ↓24h | -0,2745 | -9,0885 | 1,49E-06 |
| Nasvi2EG009166 | Acyl-CoA Delta desaturase                           | comp26940_c0_seq1   | ↑0h  | 8,8851 | 0,5290 | 2,95E-08 | comp21842_c1_seq1  | ↓24h | 10,1861 | -0,7186 | 7,67E-05 |
| Nasvi2EG009221 | Peroxidase                                          | comp37834_c0_seq8   | ↑24h | 6,1144 | 0,4788 | 6,90E-04 | comp33499_c0_seq5  | ↓0h  | 7,4232  | -0,9197 | 1,33E-08 |

|                |                                              |                    |      |         |        |          |                    |      |        |         |          |
|----------------|----------------------------------------------|--------------------|------|---------|--------|----------|--------------------|------|--------|---------|----------|
|                |                                              | comp37834_c0_seq1  | ↑4h  | 5,2015  | 0,7017 | 2,04E-04 | comp33499_c0_seq14 | ↓0h  | 5,3673 | -0,8465 | 9,96E-05 |
|                |                                              |                    | ↑24h | 5,2015  | 0,9112 | 1,51E-06 |                    |      |        |         |          |
| Nasvi2EG010628 | Alanine-glyoxylate aminotransferase 2        | comp14128_c0_seq1  | ↑0h  | 6,6830  | 0,4779 | 2,64E-04 | comp28352_c1_seq1  | ↓24h | 5,4888 | -0,7375 | 4,11E-04 |
|                |                                              | comp14128_c0_seq2  | ↑0h  | 6,9205  | 0,7802 | 8,51E-10 |                    |      |        |         |          |
|                |                                              |                    | ↑24h | 6,9205  | 0,3921 | 1,97E-03 |                    |      |        |         |          |
| Nasvi2EG010669 | Long-chain-fatty-acid--CoA ligase ACSBG2     | comp14643_c0_seq2  | ↑24h | 7,6893  | 0,3913 | 5,42E-04 | comp22964_c0_seq1  | ↓4h  | 8,2352 | -0,8118 | 4,80E-07 |
|                |                                              |                    |      |         |        |          | comp22964_c0_seq2  | ↓4h  | 6,4269 | -0,6457 | 2,13E-04 |
| Nasvi2EG010717 | 5-formyltetrahydrofolate cyclo-ligase        | comp41384_c0_seq1  | ↑24h | 4,7909  | 0,9295 | 4,58E-05 | comp36886_c0_seq1  | ↓0h  | 5,1094 | -0,8410 | 3,60E-04 |
| Nasvi2EG011011 | C-1-tetrahydrofolate synthase                | comp37840_c0_seq1  | ↑4h  | 2,7699  | 1,7655 | 9,31E-05 | comp31204_c0_seq1  | ↓4h  | 4,8041 | -1,1443 | 1,48E-05 |
|                |                                              | comp37840_c0_seq2  | ↑4h  | 6,7378  | 0,6690 | 2,61E-07 |                    |      |        |         |          |
|                |                                              |                    | ↑24h | 6,7378  | 0,6945 | 8,98E-08 |                    |      |        |         |          |
| Nasvi2EG011498 | cAMP-specific 3',5'-cyclic phosphodiesterase | comp32729_c1_seq5  | ↑4h  | 5,7126  | 0,6366 | 3,83E-05 | comp34739_c4_seq3  | ↓4h  | 5,3623 | -0,7594 | 4,53E-04 |
|                |                                              | comp34929_c0_seq3  | ↑4h  | 0,5474  | 3,4909 | 1,53E-05 |                    |      |        |         |          |
| Nasvi2EG011895 | Mediator of cell motility 1                  | comp29544_c0_seq1  | ↑0h  | 2,0136  | 2,2217 | 3,24E-04 | comp31811_c0_seq4  | ↓0h  | 3,3005 | -2,1227 | 6,49E-07 |
|                |                                              |                    |      |         |        |          | comp31811_c0_seq5  | ↓0h  | 0,8986 | -2,8738 | 3,68E-05 |
| Nasvi2EG012254 | Cytoplasmic dynein 1 intermediate chain      | comp38462_c2_seq7  | ↑0h  | -0,8002 | 7,8512 | 1,60E-04 | comp34439_c0_seq11 | ↓24h | 2,6894 | -2,5614 | 5,46E-07 |
|                |                                              |                    | ↑4h  | -0,8002 | 7,9714 | 1,80E-04 | comp34439_c0_seq2  | ↓24h | 2,3932 | -1,9182 | 4,40E-04 |
|                |                                              |                    | ↑24h | -0,8002 | 7,9852 | 9,87E-05 | comp34439_c0_seq22 | ↓24h | 1,4300 | -2,2943 | 1,60E-04 |
| Nasvi2EG012394 | Unknown                                      | comp38936_c0_seq3  | ↑24h | 0,2613  | 2,8201 | 8,68E-04 | comp34737_c1_seq2  | ↓4h  | 0,6451 | -2,4073 | 1,09E-03 |
|                |                                              | comp38936_c2_seq11 | ↑24h | 0,4979  | 3,3490 | 7,20E-05 | comp34737_c1_seq41 | ↓4h  | 0,7977 | -2,3770 | 6,99E-04 |
|                |                                              | comp38936_c2_seq20 | ↑24h | 0,9498  | 2,6011 | 1,41E-04 | comp34737_c1_seq47 | ↓4h  | 1,4807 | -2,5521 | 4,28E-05 |
|                |                                              |                    |      |         |        |          | comp34737_c1_seq44 | ↓24h | 3,1803 | -1,4567 | 4,74E-04 |
|                |                                              |                    |      |         |        |          | comp34737_c1_seq58 | ↓24h | 1,4696 | -2,1898 | 2,79E-04 |
| Nasvi2EG014157 | Anterior Fat body protein                    | comp39564_c2_seq4  | ↑0h  | 0,6705  | 2,8523 | 1,95E-04 | comp29801_c0_seq2  | ↓24h | 6,8887 | -0,5665 | 6,65E-04 |
|                |                                              |                    | ↑24h | 0,6705  | 3,2455 | 1,47E-04 |                    |      |        |         |          |
| Nasvi2EG015987 | Anion exchange protein 2                     | comp37382_c1_seq10 | ↑4h  | 4,9209  | 0,6696 | 1,87E-03 | comp30734_c0_seq3  | ↓24h | 3,9942 | -1,2383 | 2,72E-04 |
|                |                                              |                    |      |         |        |          | comp30734_c0_seq7  | ↓24h | 4,9986 | -1,1159 | 8,16E-06 |
| Nasvi2EG017772 | Metaxin-1                                    | comp36033_c0_seq1  | ↑0h  | 0,0692  | 3,7700 | 3,12E-04 | comp31841_c0_seq7  | ↓24h | 0,6855 | -2,8691 | 2,58E-04 |
| Nasvi2EG019460 | Upstream-binding protein 1                   | comp38559_c3_seq6  | ↑0h  | 4,9023  | 1,0739 | 8,59E-07 | comp33597_c4_seq1  | ↓4h  | 3,7430 | -1,1385 | 1,52E-03 |



|                |                                                                |                    |      |         |         |          |                    |      |         |         |          |
|----------------|----------------------------------------------------------------|--------------------|------|---------|---------|----------|--------------------|------|---------|---------|----------|
|                |                                                                |                    |      |         |         |          | comp33597_c4_seq10 | ↓4h  | 5,4716  | -0,6714 | 1,31E-03 |
|                |                                                                |                    |      |         |         |          |                    | ↓24h | 5,4716  | -0,7553 | 3,74E-04 |
|                |                                                                |                    |      |         |         |          | comp33597_c4_seq13 | ↓4h  | 5,8013  | -0,7799 | 5,57E-05 |
| Nasvi2EG019465 | Isochorismatase domain-containing protein 1                    | comp40396_c0_seq1  | ↑4h  | 7,8254  | 0,9853  | 1,25E-18 | comp35904_c0_seq1  | ↓24h | 8,3613  | -0,6282 | 1,07E-04 |
| Nasvi2EG020039 | Unknown                                                        | comp40067_c0_seq8  | ↑0h  | 2,2063  | 3,5026  | 2,73E-08 | comp35430_c0_seq24 | ↓24h | 1,3379  | -2,7952 | 1,30E-05 |
| Nasvi2EG020115 | Ribose-phosphate pyrophosphokinase 1                           | comp14056_c0_seq2  | ↑4h  | 8,2703  | 0,5364  | 2,72E-07 | comp17986_c0_seq2  | ↓4h  | 7,8659  | -0,6407 | 5,96E-05 |
|                |                                                                |                    |      |         |         |          | comp17986_c0_seq1  | ↓4h  | 6,6072  | -0,5409 | 1,52E-03 |
| Nasvi2EG023114 | Phosphatidylinositol 3-kinase, catalytic subunit type 3        | comp39910_c1_seq23 | ↑0h  | -0,1315 | 3,8006  | 3,27E-04 | comp32330_c0_seq5  | ↓0h  | -0,1374 | -4,6426 | 1,51E-04 |
| Nasvi2EG023755 | Dipeptidyl aminopeptidase protein 6                            | comp37608_c1_seq5  | ↑0h  | 2,6223  | 1,9552  | 8,54E-05 | comp33935_c0_seq2  | ↓24h | 4,0781  | -1,2197 | 3,31E-04 |
|                |                                                                | comp37608_c1_seq9  | ↑0h  | 0,4486  | 3,4380  | 1,38E-04 | comp33935_c0_seq3  | ↓24h | 3,0136  | -2,3908 | 3,05E-06 |
|                |                                                                |                    | ↑4h  | 0,4486  | 3,8889  | 1,27E-05 |                    |      |         |         |          |
|                |                                                                |                    | ↑24h | 0,4486  | 3,5492  | 4,87E-05 |                    |      |         |         |          |
| Nasvi2EG026831 | Spire                                                          | comp38647_c0_seq23 | ↑4h  | 3,0374  | 1,6528  | 4,45E-05 | comp34537_c1_seq8  | ↓24h | 1,2631  | -1,9727 | 1,11E-03 |
| Nasvi2EG027277 | Cytochrome P450 6a2                                            | comp39892_c0_seq10 | ↑0h  | 8,6131  | 0,5910  | 3,41E-09 | comp32522_c0_seq6  | ↓0h  | -0,5031 | -4,5833 | 2,66E-04 |
|                |                                                                |                    | ↑4h  | 8,6131  | 0,8754  | 2,29E-18 |                    | ↓24h | -0,5031 | -8,5972 | 9,80E-06 |
|                |                                                                |                    | ↑24h | 8,6131  | 0,8008  | 1,33E-15 |                    |      |         |         |          |
| Nasvi2EG036430 | Muscle-specific protein                                        | comp40134_c1_seq1  | ↑24h | 10,2374 | 0,3063  | 5,97E-05 | comp35565_c0_seq1  | ↓24h | 10,2398 | -0,6458 | 3,84E-04 |
| Nasvi2EG037293 | PH domain leucine-rich repeat-containing protein phosphatase 2 | comp28608_c0_seq1  | ↑24h | 1,8457  | 1,8606  | 1,33E-03 | comp32316_c0_seq3  | ↓4h  | 1,3113  | -2,6563 | 2,54E-05 |
| Nasvi2EG001269 | Esterase FE4                                                   | comp26462_c0_seq1  | ↓0h  | 2,9869  | -1,4849 | 7,20E-04 | comp31542_c0_seq3  | ↑24h | 4,3534  | 1,5680  | 4,37E-05 |
|                |                                                                |                    |      |         |         |          | comp31701_c1_seq2  | ↑24h | 4,2659  | 2,4546  | 6,11E-11 |
| Nasvi2EG001270 | Esterase FE4                                                   | comp14324_c0_seq1  | ↓24h | 2,0213  | -2,4780 | 2,01E-04 | comp31701_c1_seq1  | ↑24h | 3,7281  | 2,7139  | 6,80E-09 |
| Nasvi2EG002254 | Guanylate cyclase                                              | comp39271_c0_seq35 | ↓0h  | 0,7959  | -2,5988 | 2,14E-04 | comp33578_c0_seq11 | ↑4h  | 2,5787  | 1,9587  | 3,11E-04 |
|                |                                                                |                    |      |         |         |          | comp33578_c0_seq4  | ↑4h  | 1,0254  | 2,3493  | 1,95E-04 |
| Nasvi2EG002407 | spermine synthase                                              | comp32637_c0_seq3  | ↓24h | 0,4953  | -3,7293 | 3,13E-05 | comp34397_c0_seq15 | ↑24h | 1,9269  | 1,9793  | 2,43E-03 |
|                |                                                                | comp32637_c0_seq8  | ↓24h | 1,5050  | -2,3045 | 2,02E-04 |                    |      |         |         |          |
| Nasvi2EG002573 | ELAV protein 2                                                 | comp38945_c3_seq17 | ↓24h | 0,2727  | -4,5553 | 4,31E-05 | comp34728_c5_seq17 | ↑0h  | -0,0602 | 7,5419  | 3,57E-04 |
|                |                                                                |                    |      |         |         |          |                    | ↑4h  | -0,0602 | 9,4544  | 1,50E-06 |
|                |                                                                |                    |      |         |         |          |                    | ↑24h | -0,0602 | 10,9108 | 1,01E-08 |

|                |                                                           |                    |      |        |         |          |                    |      |         |         |          |
|----------------|-----------------------------------------------------------|--------------------|------|--------|---------|----------|--------------------|------|---------|---------|----------|
| Nasvi2EG003024 | dnaJ protein 1                                            | comp32266_c1_seq1  | ↓0h  | 6,2099 | -0,4914 | 5,08E-04 | comp36805_c0_seq1  | ↑24h | 6,4502  | 0,7793  | 7,86E-06 |
| Nasvi2EG003499 | Glycosylphosphatidylinositol anchor attachment 1 protein  | comp29211_c0_seq2  | ↓24h | 3,9431 | -1,1763 | 2,49E-04 | comp30546_c1_seq2  | ↑4h  | 3,3922  | 1,3866  | 7,43E-04 |
|                |                                                           |                    |      |        |         |          |                    | ↑24h | 3,3922  | 1,3136  | 9,26E-04 |
| Nasvi2EG003599 | Unknown                                                   | comp37859_c0_seq14 | ↓0h  | 1,5412 | -10,951 | 1,39E-15 | comp32890_c0_seq8  | ↑4h  | 1,8552  | 3,1942  | 2,52E-07 |
|                |                                                           |                    |      |        |         |          |                    | ↑24h | 1,8552  | 2,5314  | 2,91E-05 |
|                |                                                           |                    |      |        |         |          | comp32890_c0_seq10 | ↑4h  | 1,8972  | 2,6585  | 5,61E-06 |
|                |                                                           |                    |      |        |         |          |                    | ↑24h | 1,8972  | 2,1361  | 2,66E-04 |
|                |                                                           |                    |      |        |         |          | comp32890_c0_seq13 | ↑4h  | -0,2713 | 3,6577  | 3,21E-04 |
| Nasvi2EG003744 | Unknown                                                   | comp40897_c0_seq1  | ↓24h | 5,3959 | -0,6250 | 2,75E-04 | comp37571_c0_seq1  | ↑24h | 6,8119  | 0,6679  | 6,49E-05 |
| Nasvi2EG003940 | Cytochrome B5-related protein                             | comp14037_c0_seq1  | ↓0h  | 4,7125 | -0,9974 | 7,16E-05 | comp33057_c0_seq3  | ↑24h | 7,1907  | 0,7439  | 5,41E-06 |
|                |                                                           |                    | ↓4h  | 4,7125 | -1,6963 | 1,45E-11 |                    |      |         |         |          |
| Nasvi2EG003990 | Nasonin-2                                                 | comp40154_c1_seq1  | ↓0h  | 7,6222 | -0,7047 | 1,13E-09 | comp35720_c0_seq1  | ↑24h | 9,1613  | 1,7870  | 4,97E-23 |
|                |                                                           |                    | ↓24h | 7,6222 | -0,4770 | 4,00E-05 |                    |      |         |         |          |
| Nasvi2EG003991 | Nasonin-1                                                 | comp40297_c0_seq1  | ↓24h | 7,5581 | -0,4455 | 1,20E-04 | comp35728_c0_seq1  | ↑24h | 7,5913  | 1,6185  | 1,96E-22 |
| Nasvi2EG004153 | Unknown                                                   | comp32393_c0_seq1  | ↓4h  | 5,7582 | -0,5713 | 1,62E-04 | comp29021_c0_seq1  | ↑24h | 5,3187  | 0,9204  | 7,70E-05 |
|                |                                                           |                    | ↓24h | 5,7582 | -0,5804 | 1,32E-04 |                    |      |         |         |          |
| Nasvi2EG004317 | Unknown                                                   | comp35614_c0_seq4  | ↓0h  | 0,5143 | -2,7550 | 4,32E-04 | comp21614_c0_seq1  | ↑0h  | 0,2144  | 8,9037  | 1,75E-07 |
|                |                                                           |                    | ↓4h  | 0,5143 | -3,0620 | 2,63E-04 |                    | ↑4h  | 0,2144  | 8,6565  | 4,28E-07 |
|                |                                                           |                    | ↓24h | 0,5143 | -2,9188 | 1,49E-04 |                    | ↑24h | 0,2144  | 10,0737 | 4,02E-10 |
| Nasvi2EG004554 | Rac GTPase-activating protein                             | comp39295_c1_seq3  | ↓0h  | 8,6588 | -0,4800 | 1,25E-06 | comp32552_c2_seq1  | ↑24h | 9,5674  | 0,7218  | 3,72E-05 |
| Nasvi2EG005473 | Nahymenoptaecin-1                                         | comp39002_c0_seq1  | ↓0h  | 6,3673 | -0,6754 | 1,07E-06 | comp34500_c1_seq2  | ↑24h | 8,7915  | 1,1675  | 8,29E-12 |
|                |                                                           | comp39002_c0_seq2  | ↓0h  | 7,0258 | -0,6703 | 9,21E-08 | comp34500_c1_seq1  | ↑24h | 7,6435  | 1,1301  | 1,32E-11 |
| Nasvi2EG007441 | 1-phosphatidylinositol-4,5-bisphosphate phosphodiesterase | comp38606_c0_seq20 | ↓0h  | 4,5595 | -1,1185 | 1,64E-05 | comp33641_c1_seq15 | ↑24h | 2,4838  | 1,6322  | 1,76E-03 |
|                |                                                           | comp38606_c0_seq1  | ↓0h  | 5,0414 | -0,7995 | 1,18E-04 |                    |      |         |         |          |
| Nasvi2EG007789 | Lipid storage droplets surface-binding protein 2          | comp35521_c0_seq1  | ↓4h  | 5,4424 | -0,7769 | 3,97E-06 | comp27767_c0_seq1  | ↑24h | 5,3537  | 0,7482  | 6,43E-04 |
|                |                                                           | comp35521_c0_seq3  | ↓4h  | 4,6868 | -1,2246 | 5,64E-07 |                    |      |         |         |          |
| Nasvi2EG007954 | Uridine phosphorylase                                     | comp26800_c0_seq1  | ↓24h | 6,0478 | -0,4716 | 1,08E-03 | comp31942_c0_seq6  | ↑4h  | 6,4696  | 0,7788  | 8,14E-06 |
| Nasvi2EG008141 | lethal(2)essential for life protein                       | comp42085_c0_seq1  | ↓4h  | 3,7406 | -1,0435 | 9,63E-04 | comp38460_c0_seq1  | ↑24h | 4,7223  | 1,3300  | 1,75E-05 |
|                |                                                           |                    | ↓24h | 3,7406 | -0,9878 | 1,78E-03 |                    |      |         |         |          |

|                |                                                  |                    |      |         |         |                   |                   |        |         |          |          |
|----------------|--------------------------------------------------|--------------------|------|---------|---------|-------------------|-------------------|--------|---------|----------|----------|
| Nasvi2EG008392 | Antimicrobial peptide Def1-1                     | comp40158_c0_seq1  | ↓0h  | 5,9741  | -0,5585 | 1,45E-04          | comp36123_c0_seq1 | ↑4h    | 9,2655  | 0,3621   | 3,80E-02 |
|                |                                                  |                    | ↓24h | 5,9741  | -0,8587 | 1,85E-08          |                   | ↑24h   | 9,2655  | 1,7060   | 6,54E-22 |
| Nasvi2EG008393 | Antimicrobial peptide Def1-1                     | comp40145_c0_seq1  | ↓0h  | 7,5744  | -0,6047 | 2,01E-07          | comp35717_c0_seq1 | ↑4h    | 8,7908  | 0,7092   | 2,39E-05 |
|                |                                                  |                    |      |         |         |                   |                   | ↑24h   | 8,7908  | 1,5526   | 1,39E-19 |
| Nasvi2EG008872 | HEAT repeat-containing protein C7orf27           | comp26504_c0_seq1  | ↓0h  | 3,5335  | -1,5680 | 5,80E-06          | comp24079_c0_seq5 | ↑4h    | 3,5910  | 1,4159   | 2,59E-04 |
|                |                                                  |                    |      |         |         |                   |                   | ↑24h   | 3,5910  | 2,4569   | 2,36E-09 |
| Nasvi2EG009157 | Unknown                                          | comp16168_c0_seq2  | ↓0h  | 6,1225  | -0,5021 | 5,60E-04          | comp35771_c0_seq1 | ↑24h   | 7,0058  | 0,5048   | 2,18E-03 |
|                |                                                  |                    | ↓4h  | 6,1225  | -0,5678 | 1,29E-04          |                   |        |         |          |          |
| Nasvi2EG009349 | Nucleoporin p58/p45                              | comp35160_c0_seq3  | ↓0h  | -0,0990 | -8,9405 | 1,78E-06          | comp29535_c0_seq6 | ↑4h    | -0,2613 | 10,5048  | 1,23E-09 |
| Nasvi2EG009908 | Low-density lipoprotein receptor-related protein | comp41424_c0_seq1  | ↓4h  | 6,3567  | -0,5652 | 3,42E-05          | comp27113_c0_seq2 | ↑24h   | 3,0478  | 1,4329   | 1,16E-03 |
| Nasvi2EG011261 | Enolase-phosphatase E1                           | comp26470_c0_seq1  | ↓4h  | 5,0690  | -0,7005 | 4,18E-04          | comp31694_c0_seq1 | ↑24h   | 5,8149  | 1,4369   | 3,12E-11 |
|                |                                                  |                    | ↓24h | 5,0690  | -0,7317 | 2,41E-04          |                   |        |         |          |          |
| Nasvi2EG011349 | Hydroxysteroid dehydrogenase protein 1           | comp39591_c0_seq17 | ↓4h  | 6,0675  | -0,4759 | 8,54E-04          | comp30098_c0_seq1 | ↑24h   | 5,4626  | 1,0831   | 2,60E-07 |
|                |                                                  | comp39591_c0_seq25 | ↓4h  | 7,7508  | -0,6722 | 2,43E-09          | comp30098_c0_seq3 | ↑24h   | 9,1196  | 0,6349   | 1,74E-04 |
|                |                                                  |                    | ↓24h | 7,7508  | -0,4110 | 2,58E-04          | comp30098_c0_seq4 | ↑24h   | 5,0949  | 1,0113   | 1,92E-05 |
|                |                                                  | comp39591_c0_seq29 | ↓4h  | 4,6606  | -1,1415 | 3,38E-06          |                   |        |         |          |          |
|                |                                                  | comp39591_c0_seq36 | ↓4h  | 3,9106  | -1,3143 | 2,67E-05          |                   |        |         |          |          |
|                |                                                  | comp39591_c0_seq39 | ↓4h  | 4,5981  | -0,8559 | 7,39E-04          |                   |        |         |          |          |
|                |                                                  | comp39591_c0_seq57 | ↓4h  | 3,8491  | -1,1267 | 3,21E-04          |                   |        |         |          |          |
|                |                                                  | comp39591_c0_seq67 | ↓4h  | 3,8336  | -1,0350 | 1,08E-03          |                   |        |         |          |          |
| Nasvi2EG011454 | Unknown                                          | comp40253_c0_seq1  | ↓24h | 8,3468  | -0,7487 | 6,40E-13          | comp35622_c0_seq1 | ↑24h   | 7,9758  | 0,7714   | 1,49E-06 |
| Nasvi2EG011714 | Unknown                                          | comp27053_c0_seq1  | ↓0h  | 7,2578  | -0,7950 | 3,63E-10          | comp36024_c0_seq1 | ↑24h   | 7,1806  | 0,5804   | 9,85E-04 |
|                |                                                  | comp27053_c0_seq2  | ↓0h  | 4,0872  | -1,9238 | 3,65E-09          |                   |        |         |          |          |
| Nasvi2EG011809 | RUN and FYVE domain-containing protein 3         | comp36818_c0_seq4  | ↓4h  | 1,7007  | -2,3361 | 1,74E-04          | comp32758_c0_seq5 | ↑0h    | 1,2212  | 2,4938   | 3,09E-04 |
|                |                                                  |                    |      |         |         | comp32758_c0_seq8 | ↑0h               | 1,2747 | 2,5410  | 1,87E-04 |          |
| Nasvi2EG012170 | Paired amphipathic helix protein Sin3a           | comp36674_c0_seq4  | ↓24h | 3,7459  | -0,9991 | 1,86E-03          | comp33148_c1_seq4 | ↑24h   | 3,1828  | 1,5101   | 2,78E-04 |
| Nasvi2EG012199 | Niemann-Pick C1 protein                          | comp35712_c1_seq8  | ↓4h  | 3,7408  | -1,0419 | 1,38E-03          | comp30364_c1_seq3 | ↑24h   | 3,8478  | 1,1794   | 1,05E-03 |
|                |                                                  | comp35712_c1_seq1  | ↓4h  | 3,3485  | -1,1412 | 1,47E-03          |                   |        |         |          |          |
| Nasvi2EG012478 | Aminopeptidase N                                 | comp33902_c0_seq4  | ↓24h | 5,0147  | -0,7403 | 8,97E-04          | comp14087_c0_seq1 | ↑24h   | 3,8536  | 1,5217   | 1,53E-05 |

|                |                                            |                    |      |         |         |          |                    |      |         |        |          |
|----------------|--------------------------------------------|--------------------|------|---------|---------|----------|--------------------|------|---------|--------|----------|
|                |                                            |                    |      |         |         |          | comp14087_c0_seq2  | ↑24h | 6,4501  | 0,6544 | 1,96E-04 |
| Nasvi2EG012746 | Counting factor associated proteinD        | comp35299_c3_seq2  | ↓4h  | 9,1004  | -0,3548 | 1,18E-04 | comp21988_c0_seq2  | ↑24h | 6,6130  | 1,1764 | 3,03E-11 |
| Nasvi2EG013276 | Nahymenoptaecin-2                          | comp26972_c0_seq1  | ↓24h | 4,3834  | -2,1763 | 6,07E-12 | comp33091_c1_seq1  | ↑4h  | 7,6152  | 1,6694 | 1,42E-22 |
|                |                                            | comp26972_c0_seq2  | ↓0h  | 6,2094  | -0,4799 | 8,93E-04 |                    | ↑24h | 7,6152  | 2,2712 | 1,09E-40 |
|                |                                            |                    | ↓24h | 6,2094  | -2,3069 | 4,69E-45 | comp33091_c1_seq2  | ↑0h  | 6,9661  | 0,7357 | 1,82E-05 |
|                |                                            |                    |      |         |         |          |                    | ↑4h  | 6,9661  | 1,7869 | 1,24E-23 |
|                |                                            |                    |      |         |         |          |                    | ↑24h | 6,9661  | 2,4001 | 2,02E-41 |
| Nasvi2EG014864 | Unknown                                    | comp28074_c0_seq2  | ↓24h | 3,1998  | -1,6454 | 4,05E-05 | comp20374_c0_seq1  | ↑24h | 3,7414  | 1,1907 | 1,27E-03 |
| Nasvi2EG014898 | LA-related protein                         | comp32536_c2_seq4  | ↓0h  | 2,2381  | -1,8165 | 1,17E-03 | comp31788_c1_seq4  | ↑4h  | 5,1917  | 0,8953 | 8,82E-05 |
| Nasvi2EG015463 | Unknown                                    | comp39199_c1_seq16 | ↓4h  | -0,8121 | -4,3271 | 1,58E-03 | comp31901_c1_seq1  | ↑4h  | 1,8331  | 2,0393 | 6,75E-04 |
|                |                                            |                    |      |         |         |          |                    | ↑24h | 1,8331  | 2,8770 | 3,95E-06 |
| Nasvi2EG016630 | Unknown                                    | comp34555_c0_seq2  | ↓24h | 5,9502  | -0,8074 | 3,76E-08 | comp35353_c1_seq1  | ↑24h | 3,9599  | 1,9505 | 1,36E-08 |
| Nasvi2EG016764 | Pogo transposable element with KRAB domain | comp39896_c1_seq6  | ↓0h  | 1,1138  | -2,7052 | 1,03E-04 | comp35336_c2_seq12 | ↑24h | -0,6289 | 4,6886 | 6,76E-04 |
|                |                                            |                    | ↓4h  | 1,1138  | -2,6915 | 4,93E-05 |                    |      |         |        |          |
| Nasvi2EG018623 | Disulfide-isomerase A3                     | comp40547_c0_seq1  | ↓4h  | 7,6101  | -0,3737 | 1,10E-03 | comp36063_c0_seq1  | ↑24h | 8,1445  | 0,5836 | 3,01E-04 |
| Nasvi2EG019109 | CCR4-NOT transcription complex subunit 7   | comp36239_c0_seq3  | ↓24h | 7,2561  | -0,4716 | 9,34E-05 | comp31234_c0_seq10 | ↑24h | 2,1320  | 1,7429 | 2,26E-03 |
|                |                                            |                    |      |         |         |          | comp31234_c0_seq3  | ↑24h | 1,4591  | 3,1712 | 1,39E-04 |
| Nasvi2EG019472 | Unknown                                    | comp39053_c1_seq11 | ↓4h  | 0,5851  | -3,6346 | 1,44E-05 | comp31453_c0_seq2  | ↑4h  | -0,7299 | 6,3406 | 6,99E-06 |
|                |                                            | comp39053_c1_seq14 | ↓4h  | 0,6211  | -2,6901 | 5,03E-04 |                    |      |         |        |          |
| Nasvi2EG020437 | Limkain-B1                                 | comp26577_c1_seq1  | ↓0h  | 1,9284  | -2,1032 | 1,13E-03 | comp18577_c0_seq2  | ↑24h | 5,5353  | 1,6587 | 8,47E-14 |
| Nasvi2EG023148 | Unknown                                    | comp40553_c0_seq1  | ↓24h | 7,3421  | -0,4108 | 5,66E-04 | comp21726_c0_seq1  | ↑24h | 7,8520  | 0,7327 | 5,23E-06 |
| Nasvi2EG025129 | B-cell lymphoma 3-encoded protein          | comp34836_c0_seq1  | ↓0h  | 4,2933  | -1,1253 | 8,02E-05 | comp27762_c0_seq1  | ↑0h  | 4,1749  | 1,2747 | 1,04E-04 |
|                |                                            |                    |      |         |         |          |                    | ↑4h  | 4,1749  | 1,2625 | 1,18E-04 |

**b. Enriched GO-terms among genes with an opposed expression pattern**

| GO-ID      |   | Term                                                                  | <i>P</i> -value | #Test | #Ref |
|------------|---|-----------------------------------------------------------------------|-----------------|-------|------|
| GO:0006629 | P | lipid metabolic process                                               | 3,05E-04        | 6     | 115  |
| GO:0005811 | C | lipid particle                                                        | 2,72E-03        | 4     | 72   |
| GO:0030705 | P | cytoskeleton-dependent intracellular transport                        | 1,13E-02        | 2     | 19   |
| GO:0006520 | P | cellular amino acid metabolic process                                 | 1,14E-02        | 4     | 110  |
| GO:0016810 | F | hydrolase activity, acting on carbon-nitrogen (but not peptide) bonds | 3,33E-02        | 2     | 35   |
| GO:0051186 | P | cofactor metabolic process                                            | 4,95E-02        | 2     | 44   |

--Table S8--

**Enriched GO terms in antisense transcripts.** GO enrichment analyses of antisense transcripts for *N. vitripennis* and *N. giraulti* was done using Blast2go (Fisher's exact test,  $P < 0.05$ ). The two categories of antisense transcripts were analysed separately: 'antisense2protein' transcripts that have a hit to a *N. vitripennis* protein and 'antisense2sense' transcripts that have a hit to a sense transcript only. Generic GOSlim categories and the Blast2go option 'reduce to most specific terms' were used to limit the number of GO term categories. The enriched GO terms (GO ID and Term), the category of the GO term (C = cellular component, F = molecular function, P = biological process), their *P*-value and the number of genes in the test-set and the reference-set are given.

***N. vitripennis* antisense2protein transcripts**

| GO ID      | Category | Term                               | <i>P</i> -Value | #Test | #Ref |
|------------|----------|------------------------------------|-----------------|-------|------|
| GO:0005929 | C        | cilium                             | 6,12E-03        | 3     | 13   |
| GO:0006629 | P        | lipid metabolic process            | 8,13E-03        | 8     | 112  |
| GO:0005578 | C        | proteinaceous extracellular matrix | 2,29E-02        | 2     | 8    |
| GO:0007010 | P        | cytoskeleton organization          | 2,96E-02        | 11    | 229  |
| GO:0004518 | F        | nuclease activity                  | 3,48E-02        | 3     | 27   |
| GO:0005777 | C        | peroxisome                         | 3,79E-02        | 2     | 11   |
| GO:0006259 | P        | DNA metabolic process              | 3,98E-02        | 7     | 125  |

***N. vitripennis* antisense2sense transcripts**

| GO ID      | Category | Term                               | <i>P</i> -Value | #Test | #Ref |
|------------|----------|------------------------------------|-----------------|-------|------|
| GO:0005929 | C        | cilium                             | 1,85E-02        | 4     | 12   |
| GO:0005578 | C        | proteinaceous extracellular matrix | 2,47E-02        | 3     | 7    |
| GO:0007610 | P        | behavior                           | 3,33E-02        | 24    | 220  |
| GO:0005886 | C        | plasma membrane                    | 4,98E-02        | 34    | 350  |

***N. giraulti* antisense2protein transcripts**

| GO ID      | Category | Term                            | <i>P</i> -Value | #Test | #Ref |
|------------|----------|---------------------------------|-----------------|-------|------|
| GO:0003824 | F        | catalytic activity              | 2,31E-02        | 11    | 2348 |
| GO:0097159 | F        | organic cyclic compound binding | 2,50E-02        | 8     | 1403 |
| GO:1901363 | F        | heterocyclic compound binding   | 2,50E-02        | 8     | 1403 |
| GO:0010467 | P        | gene expression                 | 4,03E-02        | 3     | 274  |
| GO:0005694 | C        | chromosome                      | 4,74E-02        | 2     | 123  |

***N. giraulti* antisense2sense transcripts**

| GO ID      | Category | Term                         | <i>P</i> -Value | #Test | #Ref |
|------------|----------|------------------------------|-----------------|-------|------|
| GO:0007267 | P        | cell-cell signaling          | 4,18E-03        | 19    | 216  |
| GO:0009628 | P        | response to abiotic stimulus | 1,35E-02        | 11    | 112  |

|            |   |                                                         |          |    |     |
|------------|---|---------------------------------------------------------|----------|----|-----|
| GO:0005102 | F | receptor binding                                        | 1,55E-02 | 7  | 56  |
| GO:0006996 | P | organelle organization                                  | 1,90E-02 | 32 | 495 |
| GO:0040007 | P | growth                                                  | 2,17E-02 | 12 | 137 |
| GO:0009653 | P | anatomical structure morphogenesis                      | 3,46E-02 | 35 | 580 |
| GO:0005829 | C | cytosol                                                 | 4,16E-02 | 11 | 135 |
| GO:0005794 | C | Golgi apparatus                                         | 4,64E-02 | 9  | 104 |
| GO:0044403 | P | symbiosis, encompassing mutualism<br>through parasitism | 4,88E-02 | 3  | 17  |

---

--Table S9--

**Antisense transcripts.** Differentially expressed antisense transcripts are shown for (a) *N. vitripennis* and (b) *N. giraulti*. The sense transcript and the *N. vitripennis* protein (OGS 2.0) to which the antisense transcripts align are given. It is noted if an antisense transcript aligns to only a protein (p), only a sense transcript (s) or both (b). Also, the differential expression pattern after conditioning is given, compared to naïve expression levels (↑ = upregulated, ↓ = downregulated). The log2-count per million (cpm), log2-fold change (FC), and the level of significance (*P*) are given for the time points at which the transcripts are differentially expressed. In addition, (c) the antisense transcripts that align to known memory genes (see Supplementary table 5) are given.

**a. *N. vitripennis* DE antisense transcripts**

| Antisense Transcript ID |   | Sense Transcript ID | OGS 2.0 ID       | Gene description                                  | Timepoint | Log2-cpm | Log2-FC | <i>P</i> |
|-------------------------|---|---------------------|------------------|---------------------------------------------------|-----------|----------|---------|----------|
| comp12119_c0_seq2       | p | n.a.                | Nasvi2EG000878t1 | DNA polymerase η (Pol η)                          | ↑ 0h      | -0,65    | 4,92    | 6,00E-04 |
| comp39259_c1_seq2       | p | n.a.                | Nasvi2EG001007t1 | α-Esterase 6 (α-Est6)                             | ↑ 0h      | 0,39     | 3,33    | 1,89E-04 |
|                         |   |                     |                  |                                                   | ↑ 24h     | 0,39     | 2,79    | 1,19E-03 |
| comp26431_c0_seq1       | p | n.a.                | Nasvi2EG001246t1 | Unknown                                           | ↓ 4h      | 6,21     | -0,55   | 8,28E-05 |
| comp15879_c0_seq1       | p | n.a.                | Nasvi2EG001294t1 | Unknown                                           | ↑ 4h      | 8,03     | 0,44    | 3,88E-05 |
| comp41585_c0_seq1       | p | n.a.                | Nasvi2EG001648t1 | Unknown                                           | ↓ 24h     | 6,08     | -0,62   | 1,65E-05 |
| comp40576_c0_seq1       | p | n.a.                | Nasvi2EG002174t2 | Myosin light chain 2 (Mlc2)                       | ↓ 24h     | 5,09     | -1,86   | 1,42E-19 |
| comp27879_c1_seq1       | p | n.a.                | Nasvi2EG002278t1 | Unknown                                           | ↑ 4h      | 8,10     | 0,38    | 3,14E-04 |
| comp41510_c0_seq1       | p | n.a.                | Nasvi2EG002279t1 | Unknown                                           | ↑ 0h      | 5,23     | 0,85    | 5,34E-06 |
|                         |   |                     |                  |                                                   | ↑ 4h      | 5,23     | 0,73    | 7,95E-05 |
|                         |   |                     |                  |                                                   | ↑ 24h     | 5,23     | 0,63    | 7,19E-04 |
| comp35340_c0_seq2       | p | n.a.                | Nasvi2EG002592t1 | Viking (vkg)                                      | ↑ 4h      | 2,36     | 2,19    | 4,12E-05 |
|                         |   |                     |                  |                                                   | ↑ 24h     | 2,36     | 2,42    | 7,68E-06 |
| comp37392_c1_seq2       | p | n.a.                | Nasvi2EG002762t1 | Unknown                                           | ↑ 24h     | -0,65    | 4,36    | 7,86E-04 |
| comp40161_c0_seq1       | p | n.a.                | Nasvi2EG003139t2 | Coiled-coil domain-containing protein 53 (CCDC53) | ↑ 24h     | 8,15     | 0,39    | 2,04E-04 |



|                    |   |      |                  |                                                       |       |       |       |          |
|--------------------|---|------|------------------|-------------------------------------------------------|-------|-------|-------|----------|
| comp37895_c0_seq1  | p | n.a. | Nasvi2EG003222t1 | Unknown                                               | ↓ 4h  | -0,96 | -4,59 | 7,92E-04 |
| comp16006_c0_seq1  | p | n.a. | Nasvi2EG004018t1 | Unknown                                               | ↑ 4h  | 5,94  | 0,48  | 1,03E-03 |
| comp41177_c0_seq1  | p | n.a. | Nasvi2EG004581t1 | Unknown                                               | ↑ 4h  | 7,39  | 0,42  | 4,11E-04 |
| comp37243_c1_seq4  | p | n.a. | Nasvi2EG005340t1 | Estrogen receptor- $\alpha$ binding protein (DNMTIP2) | ↓ 24h | -0,52 | -4,57 | 4,14E-04 |
| comp38386_c0_seq2  | p | n.a. | Nasvi2EG005833t4 | Unknown                                               | ↓ 24h | 3,81  | -2,65 | 2,65E-15 |
| comp38386_c0_seq3  | p | n.a. | Nasvi2EG005838t3 | Unknown                                               | ↓ 24h | 2,44  | -3,30 | 6,35E-09 |
| comp32368_c0_seq1  | p | n.a. | Nasvi2EG006084t1 | Atrial natriuretic peptide-converting enzyme          | ↑ 24h | 5,19  | 0,64  | 6,22E-04 |
| comp45294_c0_seq1  | p | n.a. | Nasvi2EG006406t1 | Unknown                                               | ↑ 4h  | 6,30  | 0,43  | 1,73E-03 |
| comp40040_c1_seq13 | p | n.a. | Nasvi2EG008455t1 | Unknown                                               | ↓ 4h  | 1,27  | -2,17 | 3,70E-04 |
| comp40040_c1_seq16 | p | n.a. | Nasvi2EG008455t1 | Unknown                                               | ↓ 0h  | 0,30  | -3,38 | 8,07E-05 |
|                    |   |      |                  |                                                       | ↓ 24h | 0,30  | -3,50 | 1,21E-04 |
| comp40040_c1_seq26 | p | n.a. | Nasvi2EG008455t1 | Unknown                                               | ↑ 0h  | 1,94  | 4,78  | 4,45E-10 |
|                    |   |      |                  |                                                       | ↑ 4h  | 1,94  | 5,55  | 1,40E-13 |
|                    |   |      |                  |                                                       | ↑ 24h | 1,94  | 5,13  | 1,23E-11 |
| comp40040_c1_seq4  | p | n.a. | Nasvi2EG008455t1 | Unknown                                               | ↑ 0h  | -0,01 | 4,71  | 4,29E-05 |
|                    |   |      |                  |                                                       | ↑ 24h | -0,01 | 4,18  | 2,29E-04 |
| comp40040_c1_seq46 | p | n.a. | Nasvi2EG008455t1 | Unknown                                               | ↓ 24h | 2,50  | -3,09 | 1,60E-08 |
| comp40040_c1_seq51 | p | n.a. | Nasvi2EG008455t1 | Unknown                                               | ↓ 4h  | 0,66  | -2,99 | 6,69E-04 |
| comp40040_c1_seq72 | p | n.a. | Nasvi2EG008455t1 | Unknown                                               | ↓ 4h  | 1,07  | -8,98 | 3,16E-09 |
|                    |   |      |                  |                                                       | ↑ 24h | 1,07  | 2,50  | 2,29E-04 |
| comp36463_c3_seq1  | p | n.a. | Nasvi2EG008589t1 | Unknown                                               | ↓ 4h  | 13,80 | -0,45 | 5,58E-64 |
| comp26940_c1_seq1  | p | n.a. | Nasvi2EG009169t1 | Unknown                                               | ↑ 0h  | 8,53  | 0,63  | 4,50E-10 |
| comp39868_c0_seq3  | p | n.a. | Nasvi2EG010052t2 | Unknown                                               | ↑ 24h | 0,48  | 3,50  | 2,89E-05 |
| comp35162_c1_seq1  | p | n.a. | Nasvi2EG010771t1 | Unknown                                               | ↑ 4h  | 0,01  | 2,91  | 1,58E-03 |
| comp50390_c0_seq1  | p | n.a. | Nasvi2EG012180t1 | Unknown                                               | ↓ 0h  | 0,59  | -2,83 | 4,25E-04 |
| comp42100_c0_seq1  | p | n.a. | Nasvi2EG012476t1 | Unknown                                               | ↑ 4h  | 4,79  | 0,77  | 7,94E-04 |
| comp42076_c0_seq1  | p | n.a. | Nasvi2EG012637t1 | Unknown                                               | ↑ 0h  | 5,18  | 1,30  | 1,45E-11 |
|                    |   |      |                  |                                                       | ↑ 4h  | 5,18  | 1,21  | 2,75E-10 |
|                    |   |      |                  |                                                       | ↑ 24h | 5,18  | 0,82  | 2,05E-05 |
| comp39506_c2_seq1  | p | n.a. | Nasvi2EG013068t2 | Unknown                                               | ↓ 0h  | 4,17  | -1,14 | 1,86E-04 |

|                    |   |                    |                  |                                                      |       |       |       |          |
|--------------------|---|--------------------|------------------|------------------------------------------------------|-------|-------|-------|----------|
| comp14009_c0_seq1  | p | n.a.               | Nasvi2EG013645t1 | Mitochondrial protein                                | ↑ 24h | 7,65  | 0,53  | 3,22E-06 |
| comp33305_c0_seq1  | p | n.a.               | Nasvi2EG014392t1 | Unknown                                              | ↑ 0h  | 5,08  | 2,18  | 1,97E-25 |
|                    |   |                    |                  |                                                      | ↑ 4h  | 5,08  | 1,69  | 3,31E-16 |
|                    |   |                    |                  |                                                      | ↑ 24h | 5,08  | 1,35  | 7,10E-11 |
| comp33729_c0_seq1  | p | n.a.               | Nasvi2EG016290t1 | Unknown                                              | ↑ 24h | -1,01 | 10,18 | 4,06E-06 |
| comp40541_c0_seq1  | p | n.a.               | Nasvi2EG016509t1 | Unknown                                              | ↓ 24h | 7,78  | -0,50 | 9,93E-06 |
| comp38319_c0_seq5  | p | n.a.               | Nasvi2EG016602t1 | Unknown                                              | ↓ 0h  | -0,67 | -4,77 | 2,73E-04 |
|                    |   |                    |                  |                                                      | ↓ 4h  | -0,67 | -3,84 | 1,27E-03 |
| comp24584_c0_seq1  | p | n.a.               | Nasvi2EG017737t1 | Unknown                                              | ↓ 0h  | -0,07 | -7,49 | 3,54E-04 |
| comp36986_c0_seq1  | p | n.a.               | Nasvi2EG019969t1 | Chromatin assembly factor 1 subunit (Caf1)           | ↑ 24h | 7,47  | 0,60  | 2,48E-07 |
| comp39863_c0_seq1  | p | n.a.               | Nasvi2EG022622t1 | Unknown                                              | ↓ 4h  | -1,15 | -5,62 | 3,70E-04 |
| comp14051_c0_seq1  | p | n.a.               | Nasvi2EG022711t1 | Lactase-phlorizin hydrolase (Lph)                    | ↑ 4h  | 7,73  | 0,52  | 3,99E-06 |
| comp15701_c0_seq1  | p | n.a.               | Nasvi2EG027514t1 | Mitochondrial NADH-ubiquinone oxidoreductase chain 1 | ↑ 0h  | 5,26  | 1,06  | 4,58E-08 |
|                    |   |                    |                  |                                                      | ↑ 24h | 5,26  | 1,38  | 5,10E-13 |
| comp26945_c0_seq1  | p | n.a.               | Nasvi2EG034405t1 | Unknown                                              | ↑ 4h  | 12,63 | 0,52  | 1,03E-32 |
| comp122266_c0_seq1 | s | comp39016_c0_seq37 | Nasvi2EG000824t7 | Intersectin-1 (Its1)                                 | ↓ 4h  | -1,41 | -8,36 | 2,85E-04 |
| comp12119_c0_seq2  | b | comp33140_c0_seq3  | Nasvi2EG000878t1 | DNA polymerase η (Pol η)                             | ↑ 0h  | -0,65 | 4,92  | 6,00E-04 |
| comp30349_c1_seq2  | s | comp38971_c0_seq10 | Nasvi2EG001317t1 | C-terminal Binding Protein (CtBP)                    | ↑ 4h  | 1,13  | 2,12  | 9,62E-04 |
| comp90866_c0_seq1  | s | comp32601_c0_seq1  | Nasvi2EG001683t1 | Unknown                                              | ↓ 4h  | -0,85 | -7,52 | 9,83E-04 |
| comp40576_c0_seq1  | b | comp14182_c0_seq1  | Nasvi2EG002174t2 | Myosin light chain 2 (Mlc2)                          | ↓ 24h | 5,09  | -1,86 | 1,42E-19 |
| comp10600_c0_seq1  | s | comp35366_c0_seq6  | Nasvi2EG002377t1 | Rab-26                                               | ↑ 24h | -1,24 | 5,11  | 9,85E-04 |
| comp35340_c0_seq2  | b | comp41119_c0_seq1  | Nasvi2EG002592t1 | Viking (vkg)                                         | ↑ 4h  | 2,36  | 2,19  | 4,12E-05 |
|                    |   |                    |                  |                                                      | ↑ 24h | 2,36  | 2,42  | 7,68E-06 |
| comp144171_c0_seq1 | s | comp38870_c0_seq19 | Nasvi2EG002897t1 | Alan shepard                                         | ↑ 0h  | -0,77 | 9,52  | 1,07E-05 |
|                    |   |                    |                  |                                                      | ↑ 4h  | -0,77 | 8,50  | 1,23E-04 |
| comp148455_c0_seq1 | s | comp26213_c0_seq3  | Nasvi2EG004025t3 | Ubiquitin conjugation factor E4 A (UBE4A)            | ↑ 0h  | 0,21  | 4,51  | 1,19E-05 |
|                    |   |                    |                  |                                                      | ↑ 4h  | 0,21  | 5,08  | 6,89E-07 |
| comp245225_c0_seq1 | s | comp26213_c0_seq3  | Nasvi2EG004025t3 | Ubiquitin conjugation factor E4 A (UBE4A)            | ↑ 0h  | 0,19  | 3,52  | 2,05E-04 |
|                    |   |                    |                  |                                                      | ↑ 4h  | 0,19  | 4,16  | 9,74E-06 |
| comp40127_c2_seq1  | s | comp43375_c0_seq1  | Nasvi2EG004081t1 | Sir2-like protein 4 (Sirt4)                          | ↑ 24h | 9,81  | 0,36  | 1,42E-05 |

|                     |   |                    |                  |                                                                  |       |       |       |          |
|---------------------|---|--------------------|------------------|------------------------------------------------------------------|-------|-------|-------|----------|
| comp27593_c1_seq1   | s | comp44977_c0_seq1  | Nasvi2EG005962t3 | DDB1- and CUL4-associated factor 7 (DCAF7)                       | ↑ 0h  | 3,92  | 1,31  | 2,15E-05 |
| comp45404_c0_seq1   | s | comp14062_c0_seq1  | Nasvi2EG005970t2 | Arginine kinase (Argk)                                           | ↓ 24h | 1,82  | -1,81 | 2,00E-03 |
| comp170983_c0_seq1  | s | comp26764_c0_seq1  | Nasvi2EG007077t1 | Unknown                                                          | ↑ 0h  | 0,37  | 5,07  | 4,74E-07 |
| comp50970_c0_seq1   | s | comp33484_c1_seq2  | Nasvi2EG007097t1 | B-type amino acid transporter 1                                  | ↓ 0h  | 0,47  | -2,91 | 5,21E-04 |
| comp4527173_c0_seq1 | s | comp44329_c0_seq1  | Nasvi2EG007254t1 | Nuclear pore complex protein 153 (Nup153)                        | ↑ 0h  | -0,22 | 7,75  | 9,58E-04 |
|                     |   |                    |                  |                                                                  | ↑ 4h  | -0,22 | 8,22  | 3,43E-04 |
|                     |   |                    |                  |                                                                  | ↑ 24h | -0,22 | 11,07 | 7,11E-07 |
| comp38256_c4_seq1   | s | comp39615_c8_seq6  | Nasvi2EG008154t1 | Golgi phosphoprotein 3                                           | ↑ 0h  | 6,35  | 1,36  | 1,09E-22 |
|                     |   |                    |                  |                                                                  | ↑ 4h  | 6,35  | 0,57  | 3,63E-05 |
| comp171469_c0_seq1  | s | comp38255_c2_seq6  | Nasvi2EG008479t1 | Hippocampus abundant transcript 1 (Hiat1)                        | ↑ 0h  | -0,83 | 8,25  | 8,77E-04 |
|                     |   |                    |                  |                                                                  | ↑ 4h  | -0,83 | 7,46  | 1,43E-03 |
|                     |   |                    |                  |                                                                  | ↑ 24h | -0,83 | 8,15  | 3,84E-04 |
| comp483118_c0_seq1  | s | comp38080_c0_seq26 | Nasvi2EG008626t2 | Phosphatidylinositol 3-kinase regulatory subunit alpha           | ↑ 0h  | -0,35 | 8,20  | 9,96E-05 |
|                     |   |                    |                  |                                                                  | ↑ 4h  | -0,35 | 7,62  | 4,96E-04 |
|                     |   |                    |                  |                                                                  | ↑ 24h | -0,35 | 10,09 | 3,26E-07 |
| comp1768165_c0_seq1 | s | comp38641_c1_seq4  | Nasvi2EG009527t2 | EH domain-binding protein 1 (Ehbp1)                              | ↑ 4h  | -1,18 | 7,80  | 8,31E-04 |
| comp14746_c0_seq1   | s | comp46035_c0_seq1  | Nasvi2EG009912t1 | Glycosyltransferase family 4 protein (DPAGT1)                    | ↓ 0h  | 0,06  | -9,32 | 2,44E-07 |
| comp50390_c0_seq1   | b | comp42985_c0_seq1  | Nasvi2EG012180t1 | Unknown                                                          | ↓ 0h  | 0,59  | -2,83 | 4,25E-04 |
| comp29402_c0_seq1   | s | comp39228_c0_seq32 | Nasvi2EG013237t2 | Still life (sif)                                                 | ↑ 0h  | -0,77 | 7,71  | 2,30E-04 |
|                     |   |                    |                  |                                                                  | ↑ 4h  | -0,77 | 8,24  | 5,11E-05 |
| comp34440_c0_seq1   | s | comp35284_c0_seq1  | Nasvi2EG013374t2 | Sarcalumenin                                                     | ↓ 24h | -1,20 | -7,90 | 3,86E-04 |
| comp14009_c0_seq1   | b | comp32300_c0_seq4  | Nasvi2EG013645t1 | Mitochondrial protein                                            | ↑ 24h | 7,65  | 0,53  | 3,22E-06 |
| comp60714_c0_seq1   | s | comp14354_c0_seq1  | Nasvi2EG013795t1 | N-acetylglucosamine-1-phosphotransferase subunits $\alpha/\beta$ | ↓ 24h | -0,71 | -7,76 | 7,10E-04 |
| comp41709_c0_seq1   | s | comp42747_c0_seq1  | Nasvi2EG015630t1 | Coproporphyrinogen-III oxidase                                   | ↑ 4h  | 5,57  | 0,86  | 1,04E-07 |
|                     |   |                    |                  |                                                                  | ↑ 24h | 5,57  | 0,66  | 4,69E-05 |
| comp33729_c0_seq1   | b | comp40144_c0_seq1  | Nasvi2EG016290t1 | Unknown                                                          | ↑ 24h | -1,01 | 10,18 | 4,06E-06 |
| comp26920_c1_seq1   | s | comp14423_c0_seq2  | Nasvi2EG019953t1 | SH2 ankyrin repeat kinase (shark)                                | ↑ 0h  | 6,91  | 0,85  | 1,93E-11 |
| comp103601_c0_seq1  | s | comp39514_c1_seq6  | Nasvi2EG020485t2 | Fasciclin-1                                                      | ↑ 4h  | -1,00 | 10,34 | 4,26E-05 |
| comp40728_c0_seq1   | s | comp38591_c4_seq3  | Nasvi2EG025482t1 | Proton-coupled amino acid transporter 4 (Pat4)                   | ↓ 4h  | 5,41  | -0,56 | 8,47E-04 |

**b. *N. giraulti* DE antisense transcripts**

| Antisense Transcript ID |   | Sense Transcript ID | OGS 2.0 ID       | Gene description                                          | Timepoint | Log2-cpm | Log2-FC | P        |
|-------------------------|---|---------------------|------------------|-----------------------------------------------------------|-----------|----------|---------|----------|
| comp38357_c0_seq1       | p | n.a.                | Nasvi2EG003943t4 | Myosin II heavy chain                                     | ↓ 24h     | 3,47     | -1,52   | 7,20E-05 |
| comp22039_c0_seq1       | p | n.a.                | Nasvi2EG007369t1 | Inosine-uridine preferring nucleoside hydrolase           | ↓ 0h      | 4,51     | -1,03   | 4,52E-04 |
| comp29795_c0_seq2       | p | n.a.                | Nasvi2EG016290t1 | Unknown                                                   | ↑ 4h      | -0,36    | 4,43    | 3,21E-04 |
|                         |   |                     |                  |                                                           | ↑ 24h     | -0,36    | 4,36    | 3,45E-04 |
| comp347886_c0_seq1      | s | comp29532_c1_seq2   | Nasvi2EG000786t1 | Cold-shock DNA-binding protein                            | ↑ 0h      | -0,09    | 4,92    | 2,24E-05 |
|                         |   |                     |                  |                                                           | ↑ 4h      | -0,09    | 3,83    | 1,32E-03 |
|                         |   |                     |                  |                                                           | ↑ 24h     | -0,09    | 3,79    | 5,35E-04 |
| comp569819_c0_seq1      | s | comp34287_c1_seq37  | Nasvi2EG001295t1 | Voltage-dependent L-type calcium channel subunit β2       | ↑ 0h      | -1,06    | 9,23    | 1,20E-05 |
|                         |   |                     |                  |                                                           | ↑ 4h      | -1,06    | 8,08    | 2,07E-04 |
| comp225902_c0_seq1      | s | comp16263_c0_seq1   | Nasvi2EG002804t1 | Unknown                                                   | ↑ 0h      | 0,40     | 8,01    | 5,04E-06 |
|                         |   |                     |                  |                                                           | ↑ 4h      | 0,40     | 10,28   | 3,01E-11 |
|                         |   |                     |                  |                                                           | ↑ 24h     | 0,40     | 8,97    | 5,37E-08 |
| comp67785_c0_seq1       | s | comp37138_c0_seq1   | Nasvi2EG002805t1 | Unknown                                                   | ↑ 0h      | 0,55     | 4,17    | 7,24E-07 |
|                         |   |                     |                  |                                                           | ↑ 4h      | 0,55     | 3,88    | 4,95E-06 |
| comp27193_c0_seq1       | s | comp22661_c0_seq2   | Nasvi2EG002825t2 | Peroxisomal acyl-coenzyme A oxidase 3 (Acox3)             | ↑ 24h     | 2,84     | 2,20    | 5,79E-06 |
| comp169896_c0_seq1      | s | comp22661_c0_seq2   | Nasvi2EG002825t2 | Peroxisomal acyl-coenzyme A oxidase 3 (Acox3)             | ↑ 24h     | 1,42     | 2,36    | 8,29E-05 |
| comp187620_c0_seq1      | s | comp22661_c0_seq2   | Nasvi2EG002825t2 | Peroxisomal acyl-coenzyme A oxidase 3 (Acox3)             | ↑ 24h     | 1,45     | 2,16    | 2,91E-04 |
| comp38357_c0_seq1       | b | comp35611_c0_seq1   | Nasvi2EG003943t4 | Myosin II heavy chain                                     | ↓ 24h     | 3,47     | -1,52   | 7,20E-05 |
| comp27325_c0_seq1       | s | comp31105_c0_seq2   | Nasvi2EG004970t2 | Mi-2                                                      | ↓ 4h      | -1,02    | -8,92   | 1,75E-05 |
| comp35917_c0_seq1       | s | comp32548_c0_seq4   | Nasvi2EG005631t1 | Vacuolar protein sorting-associated protein 62 (VPS62)    | ↓ 4h      | 7,71     | -0,78   | 1,03E-06 |
|                         |   |                     |                  |                                                           | ↓ 24h     | 7,71     | -0,65   | 4,58E-05 |
| comp28725_c0_seq1       | s | comp35314_c2_seq50  | Nasvi2EG007625t1 | RalBP1-associated Eps domain-containing protein 2 (Reps2) | ↓ 24h     | 5,60     | -0,66   | 1,09E-03 |
| comp424968_c0_seq1      | s | comp21783_c2_seq1   | Nasvi2EG008589t1 | Unknown                                                   | ↑ 0h      | 1,31     | 2,75    | 2,89E-05 |
|                         |   |                     |                  |                                                           | ↑ 4h      | 1,31     | 3,03    | 8,30E-06 |
|                         |   |                     |                  |                                                           | ↑ 24h     | 1,31     | 2,32    | 4,28E-04 |
| comp3195_c0_seq1        | s | comp37565_c0_seq1   | Nasvi2EG009042t1 | Unknown                                                   | ↑ 24h     | 2,35     | 1,90    | 3,78E-04 |
| comp509400_c0_seq1      | s | comp37565_c0_seq1   | Nasvi2EG009042t1 | Unknown                                                   | ↑ 24h     | 2,12     | 1,94    | 4,82E-04 |

|                    |   |                    |                  |                                                             |       |       |       |          |
|--------------------|---|--------------------|------------------|-------------------------------------------------------------|-------|-------|-------|----------|
| comp29704_c0_seq1  | s | comp35919_c0_seq1  | Nasvi2EG009949t1 | Unknown                                                     | ↑ 4h  | 1,20  | 2,40  | 1,39E-04 |
| comp29619_c0_seq1  | s | comp16892_c0_seq1  | Nasvi2EG011945t1 | Unknown                                                     | ↑ 0h  | -1,25 | 8,21  | 2,80E-04 |
|                    |   |                    |                  |                                                             | ↑ 4h  | -1,25 | 8,38  | 2,02E-04 |
| comp22419_c0_seq1  | s | comp30627_c0_seq2  | Nasvi2EG012162t1 | AN1-type zinc finger protein 5                              | ↑ 0h  | 0,36  | 2,86  | 6,77E-04 |
| comp32497_c1_seq1  | s | comp32497_c0_seq3  | Nasvi2EG015142t1 | Neuronal synaptobrevin (n-syb)                              | ↑ 0h  | -0,20 | 8,68  | 1,46E-06 |
|                    |   |                    |                  |                                                             | ↑ 4h  | -0,20 | 9,51  | 7,14E-08 |
|                    |   |                    |                  |                                                             | ↑ 24h | -0,20 | 8,06  | 1,79E-05 |
| comp29795_c0_seq2  | b | comp35558_c0_seq1  | Nasvi2EG016290t1 | Unknown                                                     | ↑ 4h  | -0,36 | 4,43  | 3,21E-04 |
|                    |   |                    |                  |                                                             | ↑ 24h | -0,36 | 4,36  | 3,45E-04 |
| comp60918_c0_seq1  | s | comp22214_c0_seq2  | Nasvi2EG017292t1 | Alkaline sphingomyelin phosphodiesterase (aSMase)           | ↑ 0h  | 0,36  | 2,97  | 3,83E-04 |
| comp27107_c0_seq1  | s | comp29331_c3_seq2  | Nasvi2EG017578t2 | Bromo adjacent homology domain-containing 1 protein (BAHD1) | ↑ 0h  | 0,24  | 3,36  | 2,58E-04 |
|                    |   |                    |                  |                                                             | ↑ 4h  | 0,24  | 3,35  | 3,49E-04 |
| comp36012_c0_seq1  | s | comp33932_c0_seq23 | Nasvi2EG020114t1 | Metallophosphoesterase domain-containing protein 1 (Mpped1) | ↓ 4h  | 6,88  | -0,70 | 2,61E-05 |
| comp21577_c0_seq1  | s | comp35498_c0_seq22 | Nasvi2EG020143t1 | Staphylococcal nuclease domain-containing protein 1 (Snd1)  | ↑ 4h  | 0,81  | 2,72  | 1,97E-04 |
| comp289803_c0_seq1 | s | comp16755_c0_seq2  | Nasvi2EG020600t1 | Cytochrome P450 CYP4AB2                                     | ↑ 0h  | 0,07  | 3,15  | 5,69E-04 |
| comp34789_c3_seq1  | s | comp34789_c1_seq2  | Nasvi2EG023320t1 | Solute carrier family 35 member F3 (Slc35f3)                | ↓ 24h | -0,71 | -8,60 | 3,53E-05 |
| comp26624_c0_seq1  | s | comp21764_c0_seq2  | Nasvi2EG024737t1 | Rad50                                                       | ↑ 4h  | 0,45  | 2,60  | 1,48E-03 |

**c. antisense transcripts that align to known memory genes**

| Gene/transgene     | Gene description                       | Antisense Transcript ID                         |                        |
|--------------------|----------------------------------------|-------------------------------------------------|------------------------|
|                    |                                        | <i>N. vitripennis</i>                           | <i>N. giraulti</i>     |
| <i>CAMKI</i>       | calcium/calmodulin dependent kinase I  | comp35472_c2_seq1 (s)                           |                        |
| <i>CAMKII</i>      | calcium/calmodulin dependent kinase II | comp45169_c0_seq1 (s)                           |                        |
| <i>Clumsy</i>      | glutamate receptor                     | comp40019_c1_seq8 (b)<br>comp40019_c1_seq11 (b) |                        |
| <i>Crammer</i>     | trans-inhibitor of cathepsins          | comp36751_c0_seq2 (b)                           |                        |
| <i>Dunce</i>       | cAMP phosphodiesterase                 | comp24558_c0_seq1 (s)                           | comp281362_c0_seq1 (s) |
| <i>Fasciclin 1</i> | neural cell adhesion molecule          | comp103601_c0_seq1 (s)                          |                        |
| <i>GluCl</i>       | glutamate-gated chloride channel       | comp37299_c0_seq1 (s)                           |                        |
| <i>Leonardo</i>    | 14-3-3 zeta protein family             |                                                 | comp18485_c0_seq1 (b)  |
| <i>NF1</i>         | ras GTPase activating protein          | comp43282_c0_seq1 (s)                           |                        |
| <i>Octβ2R</i>      | octopamine β2 receptor                 | comp39256_c0_seq1 (s)                           |                        |
| <i>Radish</i>      | Rap GTPase activating protein          |                                                 | comp28992_c3_seq1 (s)  |
| <i>S6KII</i>       | ribosomal S6 kinase (RSK)              | comp14791_c0_seq1 (s)                           | comp130445_c0_seq1 (s) |
| <i>Tdc1</i>        | tyrosine decarboxylase 1               | comp95025_c0_seq1 (s)                           |                        |
| <i>Tequila</i>     | neurotrypsin                           | comp38985_c0_seq3 (s)<br>comp38985_c0_seq4 (s)  |                        |
